# Supplementary material for: Global Atmospheric δ13CH4 and CH4 Trends for 2000–2020 from the Atmospheric Transport Model TM5 Using CH4 from Carbon Tracker Europe–CH4 Inversions
Source: MDPI journal article supplement (doi:10.3390/atmos14071121), 2023-07-06
Supplement: s1 [file s1]

## Article

# Global Atmospheric $\delta^{13}\text{CH}_4$ and $\text{CH}_4$ Trends for 2000–2020 from the Atmospheric Transport Model TM5 Using $\text{CH}_4$ from Carbon Tracker Europe– $\text{CH}_4$ Inversions

Vilma Mannisenaho <sup>1,\*</sup> , Aki Tsuruta <sup>1</sup> , Leif Backman <sup>1</sup> , Sander Houweling <sup>2,3</sup> , Arjo Segers <sup>4</sup> , Maarten Krol <sup>5,6</sup> , Marielle Saunio <sup>7</sup> , Benjamin Poulter <sup>8</sup> , Zhen Zhang <sup>9</sup> , Xin Lan <sup>10</sup> , Edward J. Dlugokencky <sup>10</sup> , Sylvia Michel <sup>11</sup> , James W. C. White <sup>12</sup> and Tuula Aalto <sup>1</sup> 

- <sup>1</sup> Finnish Meteorological Institute, P.O. Box 503, FI-00101 Helsinki, Finland; aki.tsuruta@fmi.fi (A.T.); leif.backman@fmi.fi (L.B.); tuula.aalto@fmi.fi (T.A.)
- <sup>2</sup> SRON Netherlands Institute for Space Research, 2333 CA Leiden, The Netherlands; s.houweling@srn.nl
- <sup>3</sup> Vrije Universiteit Amsterdam, Department of Earth Sciences, 1081 HV Amsterdam, The Netherlands
- <sup>4</sup> Netherlands Organisation for Applied Scientific Research (TNO), Department of Climate, Air & Sustainability, P.O. Box 80015, 3508 TA Utrecht, The Netherlands; arjo.segers@tno.nl
- <sup>5</sup> Department of Environmental Sciences, Wageningen University & Research, Meteorology and Air Quality, P.O. Box 47, 6700 AA Wageningen, The Netherlands; maarten.krol@wur.nl
- <sup>6</sup> Institute for Marine and Atmospheric Research Utrecht IMAU, Utrecht University, Str Princetonplein 5, 3584 CC Utrecht, The Netherlands
- <sup>7</sup> MCF–Université de Versailles Saint-Quentin, Laboratoire des Sciences du Climat et de l'Environnement, CEA-Orme des Merisiers, 91191 GIF-SUR-YVETTE, France; marielle.saunio@lsce.ipsl.fr
- <sup>8</sup> NASA Goddard Space Flight Center, 8800 Greenbelt Rd, Greenbelt, MD 20771, USA; benjamin.poulter@nasa.gov
- <sup>9</sup> Earth System Science Interdisciplinary Center, University of Maryland, 5825 University Research Ct Suite 4001, College Park, MD 20740, USA; yuisheng@gmail.com
- <sup>10</sup> NOAA Global Monitoring Laboratory (GML), 325 Broadway, Boulder, CO 80305, USA; xin.lan@noaa.gov (X.L.); ed.dlugokencky@noaa.gov (E.J.D.)
- <sup>11</sup> Institute of Arctic and Alpine Research (INSTAAR), University of Colorado, Campus Box 450, Boulder, CO 80309-0450, USA; sylvia.englund@colorado.edu
- <sup>12</sup> University of North Carolina at Chapel Hill, Department of Earth Marine and Environmental Sciences, Chapel Hill, NC 27514, USA; jwcwhite@unc.edu
- \* Correspondence: vilma.mannisenaho@fmi.fi (V. M.)

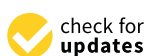

**Citation:** Mannisenaho, V.; Tsuruta, A.; Backman, L.; Houweling, S.; Segers, A.; Krol, M.; Saunio, M.; Poulter, B.; Zhang, Z.; Lan, X.; et al. Global Atmospheric  $\delta^{13}\text{CH}_4$  and  $\text{CH}_4$  Trends for 2000–2020 from the Atmospheric Transport Model TM5 Using  $\text{CH}_4$  from Carbon Tracker Europe– $\text{CH}_4$  Inversions. *Atmosphere* **2023**, *14*, 1121. <https://doi.org/10.3390/atmos14071121>

Academic Editors: Ge Han and Miao Zhang

Received: 23 April 2023

Revised: 30 May 2023

Accepted: 4 July 2023

Published: 6 July 2023

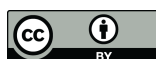

**Copyright:** © 2023 by the authors. Licensee MDPI, Basel, Switzerland. This article is an open access article distributed under the terms and conditions of the Creative Commons Attribution (CC BY) license (<https://creativecommons.org/licenses/by/4.0/>).

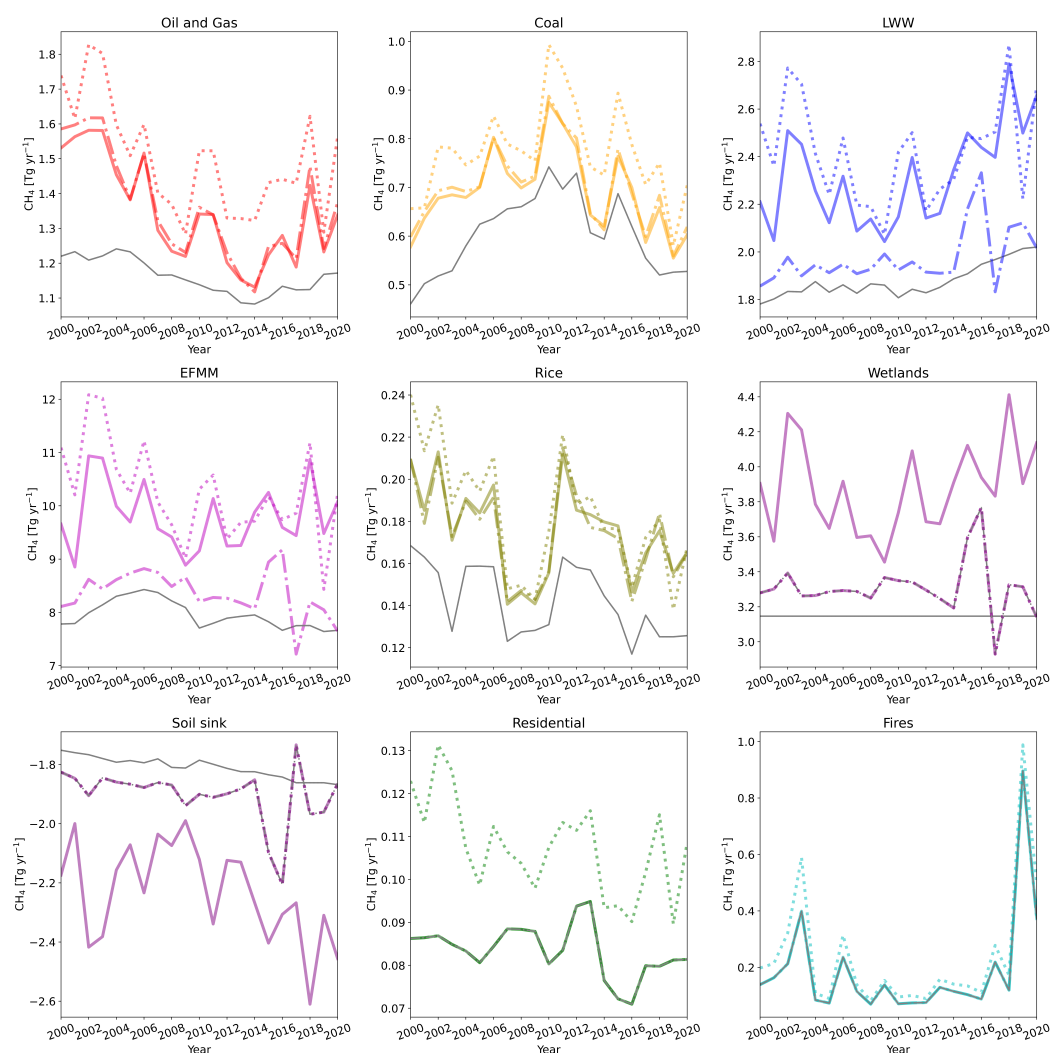

**Figure S1.** 90° S–30° S prior and posterior CH<sub>4</sub> emissions by sector. Solid lines are SET1, dash dot lines are SET2, and dotted are ORIG. Posterior emission are bolded, and prior emissions are presented in gray. For emissions from residential and fires, please note that priors (SET1, SET2 and ORIG) are the same as posteriors for SET1 and SET2.

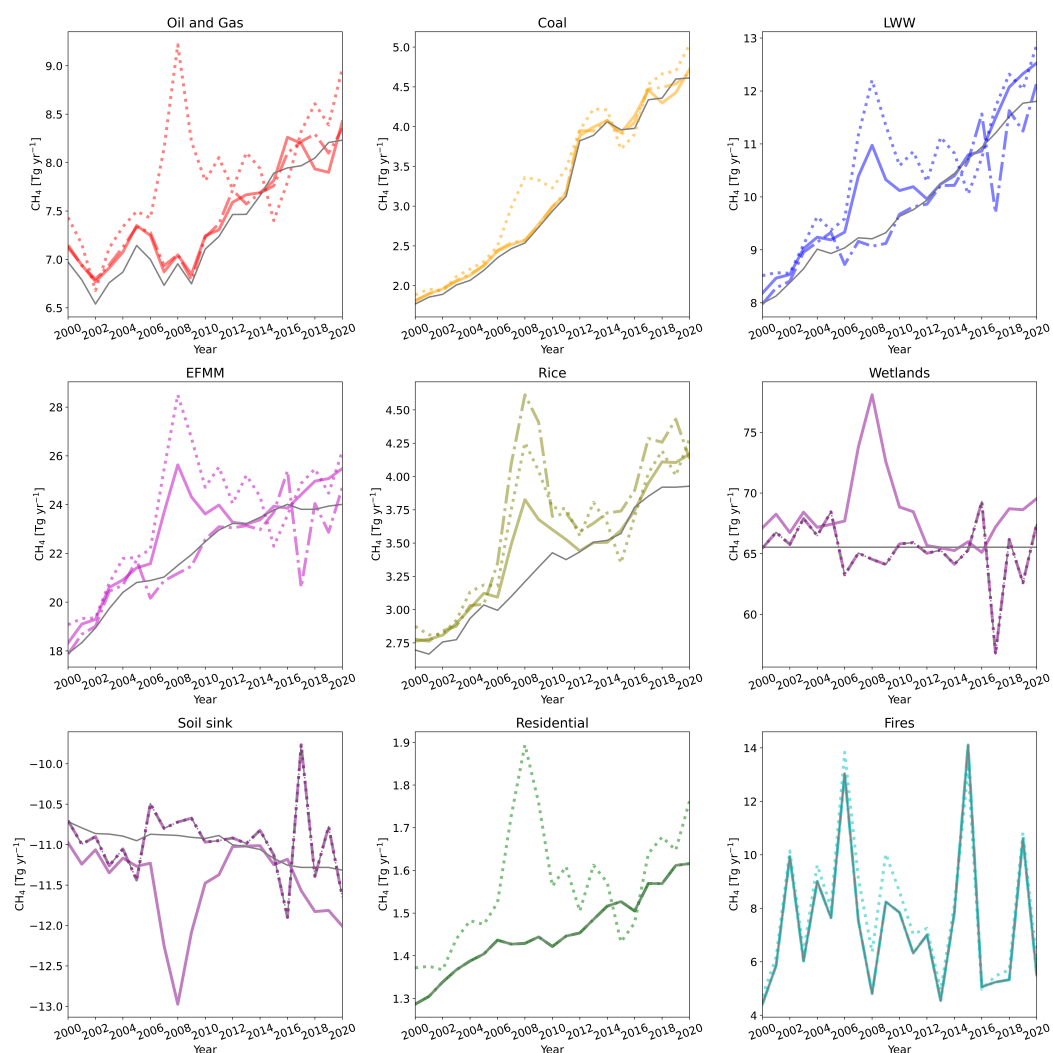

**Figure S2.** 30° S-EQ prior and posterior CH<sub>4</sub> emissions by sector. Solid lines are SET1, dash dot lines are SET2, and dotted are ORIG. Posterior emission are bolded, and prior emissions are presented in gray. For emissions from residential and fires, please note that priors (SET1, SET2 and ORIG) are the same as posteriors for SET1 and SET2.

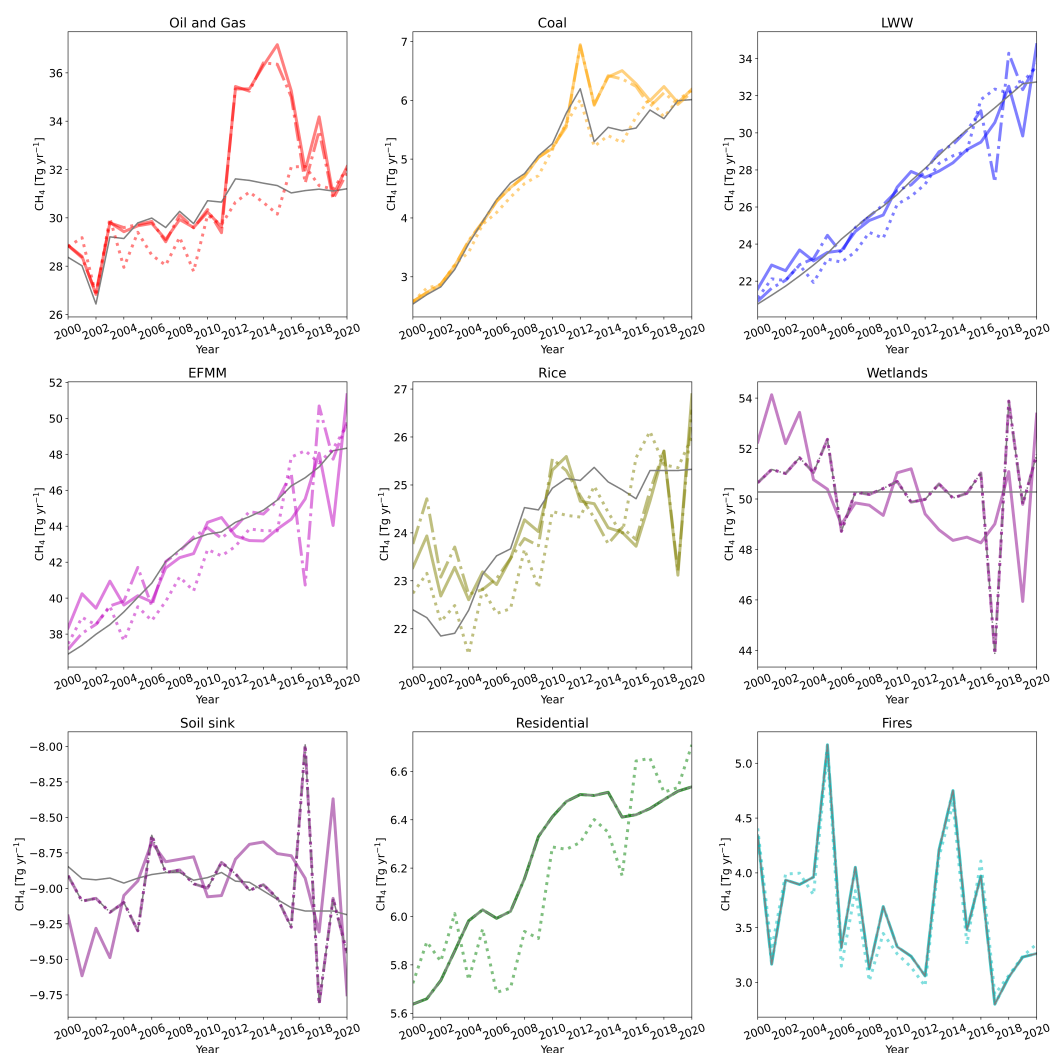

**Figure S3.** EQ-30° N prior and posterior  $\text{CH}_4$  emissions by sector. Solid lines are SET1, dash dot lines are SET2, and dotted are ORIG. Posterior emission are bolded, and prior emissions are presented in gray. For emissions from residential and fires, please note that priors (SET1, SET2 and ORIG) are the same as posteriors for SET1 and SET2.



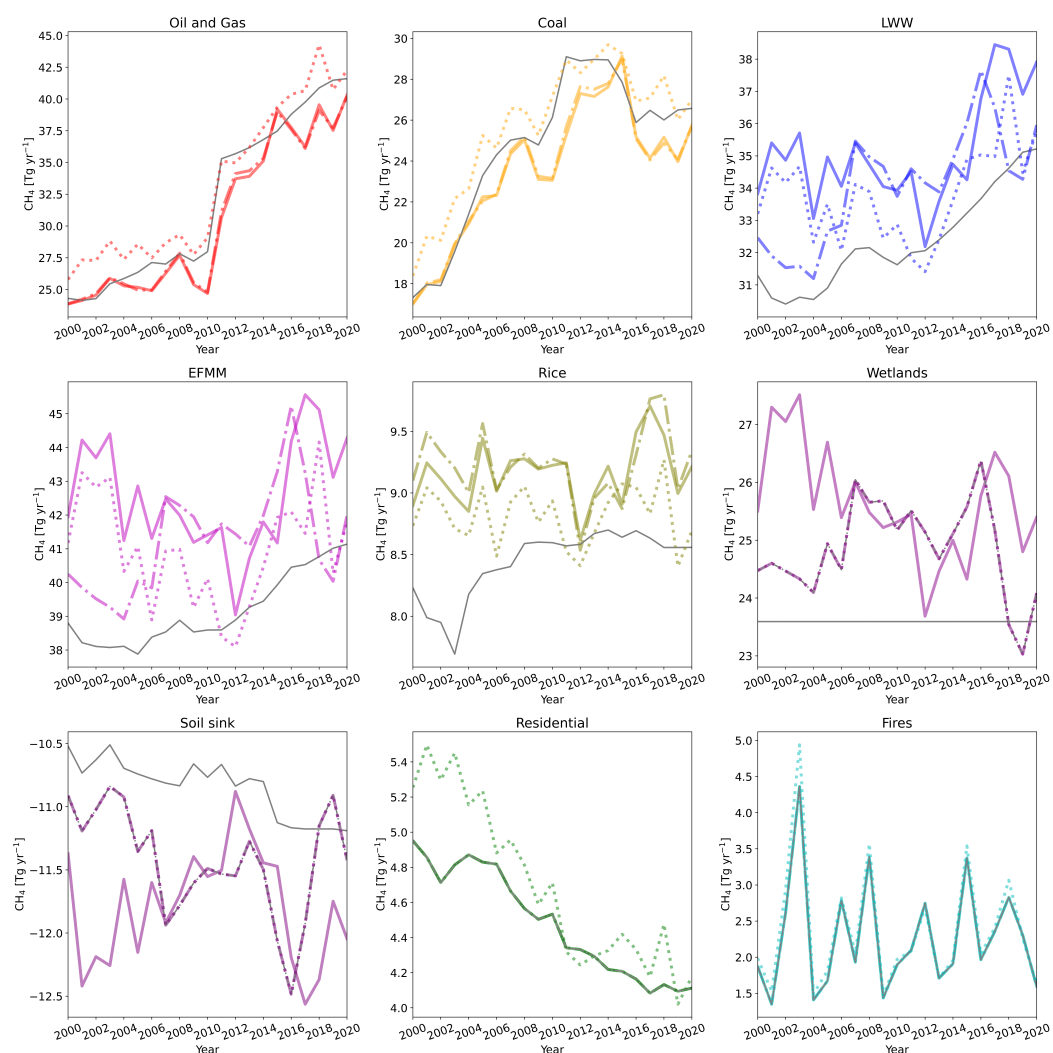

**Figure S4.** 30° N–60° N prior and posterior CH<sub>4</sub> emissions by sector. Solid lines are SET1, dash dot lines are SET2, and dotted are ORIG. Posterior emission are bolded, and prior emissions are presented in gray. For emissions from residential and fires, please note that priors (SET1, SET2 and ORIG) are the same as posteriors for SET1 and SET2.

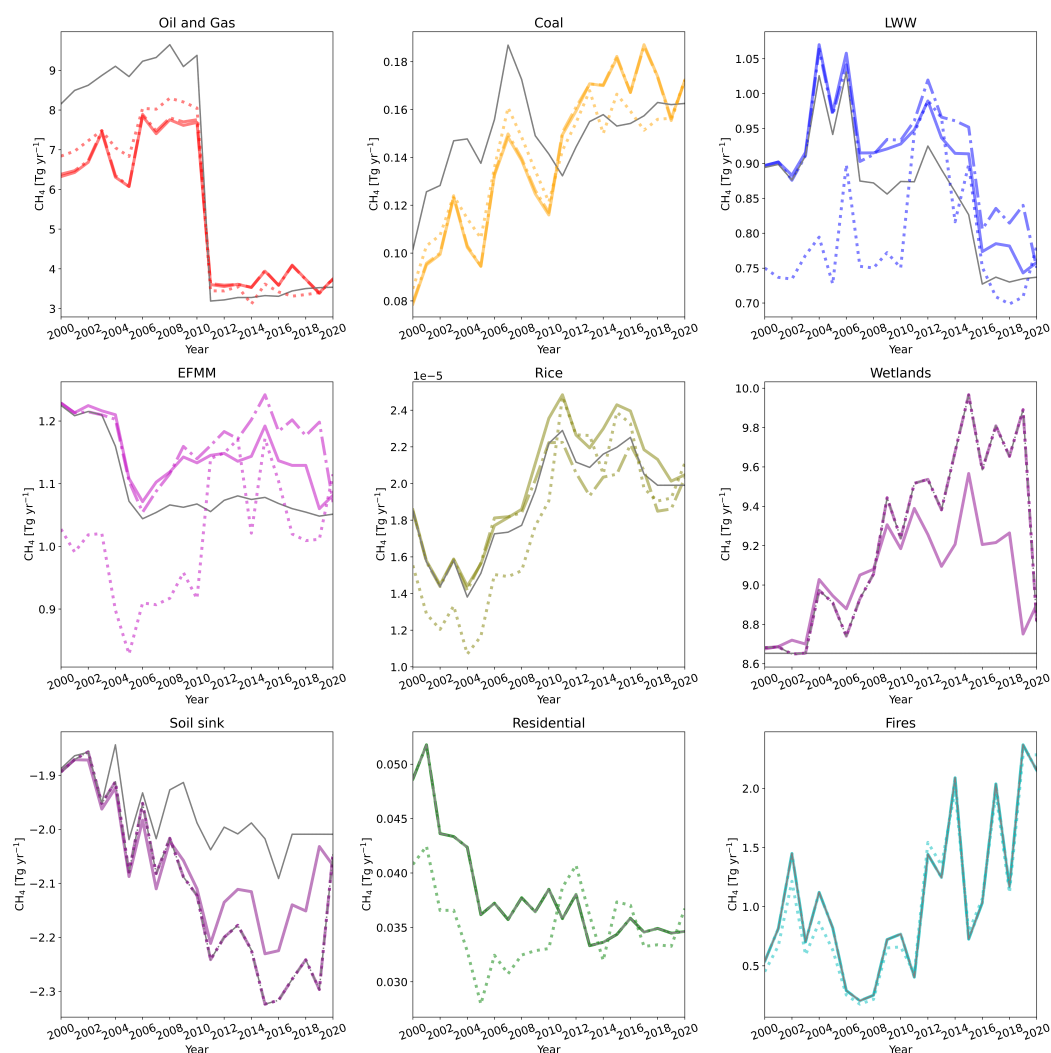

**Figure S5.** 60° N–90° N prior and posterior CH<sub>4</sub> emissions by sector. Solid lines are SET1, dash dot lines are SET2, and dotted are ORIG. Posterior emission are bolded, and prior emissions are presented in gray. For emissions from residential and fires, please note that priors (SET1, SET2 and ORIG) are the same as posteriors for SET1 and SET2.

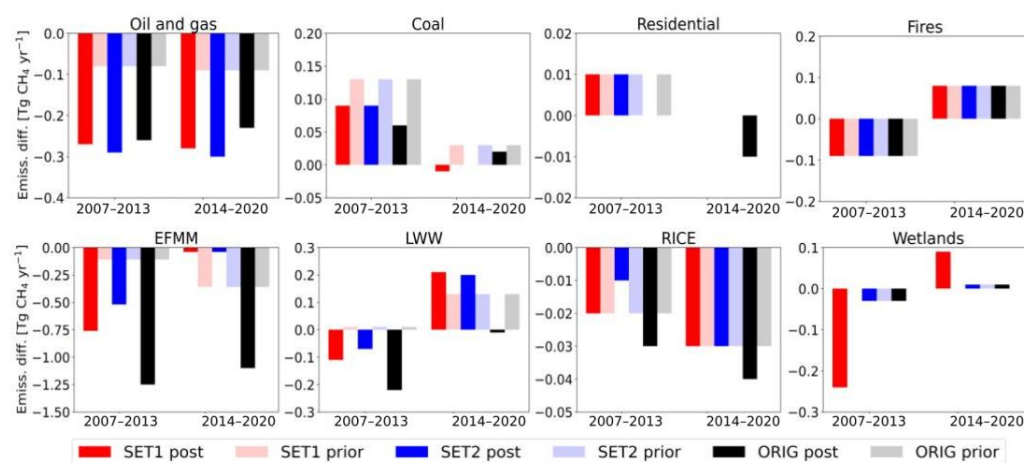

**Figure S6.** Difference in prior and posterior emissions at 90° S–30° S from three different inversions compared to the years 2000–2006.

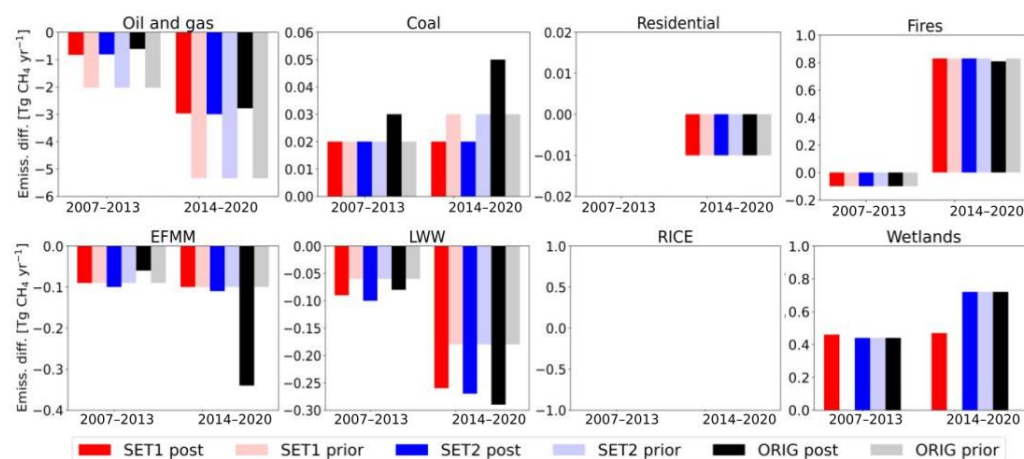

**Figure S7.** Difference in prior and posterior emissions at 60° N–90° N from three different inversions compared to the years 2000–2006.

**Table S1.** List of stations.

| Station           | Station code | Country                   | Latitude | Longitude | Elevation<br>[m a.s.l.] | intake height<br>[m a. g.] |
|-------------------|--------------|---------------------------|----------|-----------|-------------------------|----------------------------|
| Alert             | ALT          | Nunavut, Canada           | 82.45° N | 62.51° W  | 195                     | 5                          |
| Terceira Island   | AZR          | Azores, Portugal          | 38.77° N | 27.38° W  | 19                      | 5                          |
| Tae-ahn Peninsula | TAP          | Republic of Korea         | 36.74° N | 126.13° E | 16                      | 5                          |
| Mt. Waliguan      | WLG          | Peoples Republic of China | 36.29° N | 100.90° E | 3810                    | 5                          |
| Cape Kumukahi     | KUM          | Hawaii, United States     | 19.56° N | 154.89° W | 3–8                     | 3–5                        |
| Mauna Loa         | MLO          | Hawaii, United States     | 19.54° N | 155.58° W | 3397                    | 5–40                       |
| Ascension Island  | ASC          | United Kingdom            | 7.97° S  | 14.4° W   | 85                      | 5                          |
| Tutuila           | SMO          | American Samoa            | 14.25° S | 170.56° W | 42                      | 5–18.3                     |
| Cape Grim         | CGO          | Tasmania, Australia       | 40.68° S | 144.69° E | 94                      | 70                         |

**Table S2.** Annual mean CH<sub>4</sub> emissions for 30° latitudinal bands during 2000–2020. Emissions are shown for the different simulations.

| Source      | Simulation | 90° S–30° S  | 30° S–EQ      | EQ–30° N     | 30° N–60° N   | 60° N–90° N  | Global        |
|-------------|------------|--------------|---------------|--------------|---------------|--------------|---------------|
| LWW         |            |              |               |              |               |              |               |
| Posterior   | SET1       | 2.25 ± 0.18  | 10.62 ± 0.80  | 26.86 ± 1.68 | 35.02 ± 1.25  | 0.86 ± 0.05  | 75.61 ± 0.92  |
|             | SET2       | 2.23 ± 0.16  | 10.73 ± 0.93  | 26.87 ± 1.90 | 35.21 ± 1.40  | 0.85 ± 0.07  | 75.89 ± 1.04  |
|             | ORIG       | 2.31 ± 0.16  | 10.53 ± 0.91  | 26.35 ± 1.53 | 33.34 ± 2.20  | 0.85 ± 0.13  | 73.37 ± 1.16  |
| Prior       | SET1       | 1.88 ± 0.19  | 9.80 ± 0.79   | 26.82 ± 1.83 | 32.34 ± 1.70  | 0.86 ± 0.05  | 71.70 ± 1.07  |
|             | SET2       | 1.88 ± 0.17  | 9.80 ± 0.96   | 26.82 ± 2.06 | 32.34 ± 1.88  | 0.86 ± 0.08  | 71.70 ± 1.21  |
|             | ORIG       | 1.88 ± 0.17  | 9.80 ± 0.92   | 26.82 ± 1.85 | 32.34 ± 2.33  | 0.86 ± 0.15  | 71.70 ± 1.28  |
| EFMM        |            |              |               |              |               |              |               |
| Posterior   | SET1       | 9.93 ± 0.78  | 24.54 ± 1.84  | 43.98 ± 2.74 | 42.90 ± 1.53  | 1.10 ± 0.06  | 122.46 ± 1.55 |
|             | SET2       | 9.84 ± 0.70  | 24.75 ± 2.12  | 44.02 ± 3.11 | 43.16 ± 1.72  | 1.10 ± 0.09  | 122.87 ± 1.74 |
|             | ORIG       | 10.18 ± 0.69 | 24.38 ± 2.11  | 43.30 ± 2.50 | 41.90 ± 2.77  | 1.07 ± 0.16  | 120.83 ± 1.80 |
| Prior       | SET1       | 7.96 ± 0.79  | 21.91 ± 1.77  | 42.95 ± 2.91 | 39.15 ± 2.05  | 1.10 ± 0.07  | 113.07 ± 1.69 |
|             | SET2       | 7.96 ± 0.71  | 21.91 ± 2.14  | 42.95 ± 3.29 | 39.15 ± 2.28  | 1.10 ± 0.10  | 113.07 ± 1.90 |
|             | ORIG       | 7.96 ± 0.73  | 21.91 ± 2.05  | 42.95 ± 2.95 | 39.15 ± 2.81  | 1.10 ± 0.18  | 113.07 ± 1.91 |
| RICE        |            |              |               |              |               |              |               |
| Posterior   | SET1       | 0.17 ± 0.01  | 3.17 ± 0.24   | 23.16 ± 1.44 | 8.96 ± 0.32   | 0.00 ± 0.00  | 35.46 ± 0.61  |
|             | SET2       | 0.17 ± 0.01  | 3.16 ± 0.28   | 22.94 ± 1.62 | 9.02 ± 0.36   | 0.00 ± 0.00  | 35.29 ± 0.69  |
|             | ORIG       | 0.18 ± 0.01  | 3.12 ± 0.27   | 22.29 ± 1.29 | 8.24 ± 0.54   | 0.00 ± 0.00  | 33.81 ± 0.58  |
| Prior       | SET1       | 0.14 ± 0.01  | 3.32 ± 0.27   | 24.12 ± 1.63 | 8.43 ± 0.44   | 0.00 ± 0.00  | 36.02 ± 0.70  |
|             | SET2       | 0.14 ± 0.01  | 3.32 ± 0.33   | 24.12 ± 1.85 | 8.43 ± 0.49   | 0.00 ± 0.00  | 36.02 ± 0.79  |
|             | ORIG       | 0.14 ± 0.01  | 3.32 ± 0.31   | 24.12 ± 1.65 | 8.43 ± 0.61   | 0.00 ± 0.00  | 36.02 ± 0.73  |
| Soil sink   |            |              |               |              |               |              |               |
| Posterior   | SET1       | -2.30 ± 0.18 | -12.59 ± 0.94 | -8.98 ± 0.56 | -11.40 ± 0.41 | -2.01 ± 0.11 | -37.29 ± 0.49 |
|             | SET2       | -1.85 ± nan  | -10.82 ± nan  | -8.83 ± nan  | -10.64 ± nan  | -1.97 ± nan  | -34.11 ± nan  |
|             | ORIG       | -1.85 ± 0.47 | -10.82 ± 1.06 | -8.83 ± 0.71 | -10.64 ± 0.64 | -1.97 ± 0.12 | -34.11 ± 0.65 |
| Prior       | SET1       | -1.81 ± 0.18 | -11.01 ± 0.89 | -8.99 ± 0.61 | -10.85 ± 0.57 | -1.97 ± 0.12 | -34.62 ± 0.51 |
|             | SET2       | -1.85 ± 0.00 | -10.82 ± nan  | -8.83 ± nan  | -10.64 ± nan  | -1.97 ± nan  | -34.11 ± 0.00 |
|             | ORIG       | -1.81 ± 0.49 | -11.01 ± 1.08 | -8.99 ± 0.73 | -10.85 ± 0.70 | -1.97 ± 0.13 | -34.62 ± 0.67 |
| Termites    |            |              |               |              |               |              |               |
| Posterior   | SET1       | 0.53 ± nan   | 4.18 ± nan    | 2.76 ± nan   | 2.43 ± nan    | 0.00 ± nan   | 9.91 ± nan    |
|             | SET2       | 0.53 ± nan   | 4.18 ± nan    | 2.76 ± nan   | 2.43 ± nan    | 0.00 ± nan   | 9.91 ± nan    |
|             | ORIG       | 0.53 ± nan   | 4.18 ± nan    | 2.76 ± nan   | 2.43 ± nan    | 0.00 ± nan   | 9.91 ± nan    |
| Prior       | SET1       | 0.53 ± nan   | 4.18 ± nan    | 2.76 ± nan   | 2.43 ± nan    | 0.00 ± nan   | 9.91 ± nan    |
|             | SET2       | 0.53 ± nan   | 4.18 ± nan    | 2.76 ± nan   | 2.43 ± nan    | 0.00 ± nan   | 9.91 ± nan    |
|             | ORIG       | 0.53 ± nan   | 4.18 ± nan    | 2.76 ± nan   | 2.43 ± nan    | 0.00 ± nan   | 9.91 ± nan    |
| Ocean       |            |              |               |              |               |              |               |
| Posterior   | SET1       | 0.65 ± nan   | 2.95 ± nan    | 3.79 ± nan   | 1.90 ± nan    | 2.19 ± nan   | 11.48 ± nan   |
|             | SET2       | 0.65 ± nan   | 2.95 ± nan    | 3.79 ± nan   | 1.90 ± nan    | 2.19 ± nan   | 11.48 ± nan   |
|             | ORIG       | 0.65 ± nan   | 2.95 ± nan    | 3.79 ± nan   | 1.90 ± nan    | 2.19 ± nan   | 11.48 ± nan   |
| Prior       | SET1       | 0.65 ± nan   | 2.95 ± nan    | 3.79 ± nan   | 1.90 ± nan    | 2.19 ± nan   | 11.48 ± nan   |
|             | SET2       | 0.65 ± nan   | 2.95 ± nan    | 3.79 ± nan   | 1.90 ± nan    | 2.19 ± nan   | 11.48 ± nan   |
|             | ORIG       | 0.65 ± nan   | 2.95 ± nan    | 3.79 ± nan   | 1.90 ± nan    | 2.19 ± nan   | 11.48 ± nan   |
| Wetlands    |            |              |               |              |               |              |               |
| Posterior   | SET1       | 3.88 ± 0.31  | 67.68 ± 5.06  | 49.96 ± 3.11 | 25.18 ± 0.89  | 9.09 ± 0.50  | 155.79 ± 2.47 |
|             | SET2       | 3.24 ± nan   | 64.44 ± nan   | 49.59 ± nan  | 23.79 ± nan   | 8.95 ± nan   | 150.00 ± nan  |
|             | ORIG       | 3.24 ± 0.83  | 64.44 ± 6.32  | 49.59 ± 3.99 | 23.79 ± 1.43  | 8.95 ± 0.54  | 150.00 ± 3.15 |
| Prior       | SET1       | 3.15 ± 0.31  | 65.53 ± 5.28  | 50.28 ± 3.40 | 23.59 ± 1.23  | 8.65 ± 0.52  | 151.20 ± 2.63 |
|             | SET2       | 3.24 ± 0.00  | 64.44 ± nan   | 49.59 ± nan  | 23.79 ± nan   | 8.95 ± nan   | 150.00 ± 0.00 |
|             | ORIG       | 3.15 ± 0.85  | 65.53 ± 6.43  | 50.28 ± 4.06 | 23.59 ± 1.51  | 8.65 ± 0.55  | 151.20 ± 3.21 |
| Oil and gas |            |              |               |              |               |              |               |
| Posterior   | SET1       | 1.35 ± 0.23  | 7.40 ± 1.16   | 31.94 ± 3.38 | 34.10 ± 4.19  | 5.43 ± 1.26  | 80.22 ± 2.31  |
|             | SET2       | 1.36 ± 0.23  | 7.42 ± 1.16   | 31.84 ± 3.38 | 34.11 ± 4.18  | 5.46 ± 1.26  | 80.19 ± 2.31  |
|             | ORIG       | 1.44 ± 0.10  | 7.51 ± 0.65   | 29.28 ± 1.69 | 33.48 ± 2.31  | 5.31 ± 0.93  | 77.03 ± 1.26  |
| Prior       | SET1       | 1.16 ± 0.23  | 7.32 ± 1.18   | 30.17 ± 3.38 | 31.98 ± 3.82  | 6.30 ± 1.74  | 76.93 ± 2.26  |
|             | SET2       | 1.16 ± 0.23  | 7.32 ± 1.18   | 30.17 ± 3.38 | 31.98 ± 3.82  | 6.30 ± 1.74  | 76.93 ± 2.26  |
|             | ORIG       | 1.16 ± 0.11  | 7.32 ± 0.68   | 30.17 ± 2.06 | 31.98 ± 2.38  | 6.30 ± 1.36  | 76.93 ± 1.43  |

Table S2. Cont.

| Source      | Simulation | 90° S–30° S | 30° S–EQ    | EQ–30° N    | 30° N–60° N  | 60° N–90° N | Global       |
|-------------|------------|-------------|-------------|-------------|--------------|-------------|--------------|
| Coal        |            |             |             |             |              |             |              |
| Posterior   | SET1       | 0.69 ± 0.12 | 3.22 ± 0.55 | 4.48 ± 0.49 | 20.05 ± 2.41 | 0.15 ± 0.03 | 28.59 ± 1.03 |
|             | SET2       | 0.70 ± 0.12 | 3.23 ± 0.55 | 4.45 ± 0.49 | 20.19 ± 2.42 | 0.15 ± 0.03 | 28.73 ± 1.04 |
|             | ORIG       | 0.84 ± 0.06 | 3.23 ± 0.29 | 4.41 ± 0.26 | 23.81 ± 1.58 | 0.16 ± 0.02 | 32.45 ± 0.67 |
| Prior       | SET1       | 0.60 ± 0.12 | 3.12 ± 0.55 | 4.76 ± 0.56 | 24.67 ± 2.94 | 0.15 ± 0.03 | 33.31 ± 1.24 |
|             | SET2       | 0.60 ± 0.12 | 3.12 ± 0.55 | 4.76 ± 0.56 | 24.67 ± 2.94 | 0.15 ± 0.03 | 33.31 ± 1.24 |
|             | ORIG       | 0.60 ± 0.06 | 3.12 ± 0.31 | 4.76 ± 0.34 | 24.67 ± 1.82 | 0.15 ± 0.02 | 33.31 ± 0.77 |
| Residential |            |             |             |             |              |             |              |
| Posterior   | SET1       | 0.08 ± nan  | 1.45 ± nan  | 6.22 ± nan  | 4.48 ± nan   | 0.04 ± nan  | 12.28 ± nan  |
|             | SET2       | 0.08 ± nan  | 1.45 ± nan  | 6.22 ± nan  | 4.48 ± nan   | 0.04 ± nan  | 12.28 ± nan  |
|             | ORIG       | 0.08 ± 0.01 | 1.44 ± 0.12 | 6.13 ± 0.35 | 4.46 ± 0.29  | 0.04 ± 0.01 | 12.15 ± 0.19 |
| Prior       | SET1       | 0.08 ± nan  | 1.45 ± nan  | 6.22 ± nan  | 4.48 ± nan   | 0.04 ± nan  | 12.28 ± nan  |
|             | SET2       | 0.08 ± nan  | 1.45 ± nan  | 6.22 ± nan  | 4.48 ± nan   | 0.04 ± nan  | 12.28 ± nan  |
|             | ORIG       | 0.08 ± 0.01 | 1.45 ± 0.14 | 6.22 ± 0.43 | 4.48 ± 0.32  | 0.04 ± 0.01 | 12.28 ± 0.22 |
| Geological  |            |             |             |             |              |             |              |
| Posterior   | SET1       | 0.54 ± nan  | 1.76 ± nan  | 2.80 ± nan  | 15.53 ± nan  | 2.37 ± nan  | 23.00 ± nan  |
|             | SET2       | 0.54 ± nan  | 1.76 ± nan  | 2.80 ± nan  | 15.53 ± nan  | 2.37 ± nan  | 23.00 ± nan  |
|             | ORIG       | 0.54 ± nan  | 1.76 ± nan  | 2.80 ± nan  | 15.53 ± nan  | 2.37 ± nan  | 23.00 ± nan  |
| Prior       | SET1       | 0.54 ± nan  | 1.76 ± nan  | 2.80 ± nan  | 15.53 ± nan  | 2.37 ± nan  | 23.00 ± nan  |
|             | SET2       | 0.54 ± nan  | 1.76 ± nan  | 2.80 ± nan  | 15.53 ± nan  | 2.37 ± nan  | 23.00 ± nan  |
|             | ORIG       | 0.54 ± nan  | 1.76 ± nan  | 2.80 ± nan  | 15.53 ± nan  | 2.37 ± nan  | 23.00 ± nan  |
| Fires       |            |             |             |             |              |             |              |
| Posterior   | SET1       | 0.19 ± nan  | 7.42 ± nan  | 3.67 ± nan  | 2.27 ± nan   | 1.06 ± nan  | 14.61 ± nan  |
|             | SET2       | 0.19 ± nan  | 7.42 ± nan  | 3.67 ± nan  | 2.27 ± nan   | 1.06 ± nan  | 14.61 ± nan  |
|             | ORIG       | 0.19 ± 0.02 | 7.33 ± 0.71 | 3.63 ± 0.21 | 2.22 ± 0.15  | 1.04 ± 0.14 | 14.40 ± 0.32 |
| Prior       | SET1       | 0.19 ± nan  | 7.42 ± nan  | 3.67 ± nan  | 2.27 ± nan   | 1.06 ± nan  | 14.61 ± nan  |
|             | SET2       | 0.19 ± nan  | 7.42 ± nan  | 3.67 ± nan  | 2.27 ± nan   | 1.06 ± nan  | 14.61 ± nan  |
|             | ORIG       | 0.19 ± 0.02 | 7.42 ± 0.77 | 3.67 ± 0.25 | 2.27 ± 0.17  | 1.06 ± 0.16 | 14.61 ± 0.34 |

**Table S3.** Posterior mean emissions for 30 degree latitudinal bands for different time periods. Emissions are shown for the different simulations. Prior mean emissions are shown in *italic*.

| Lat. band | Category    | 2000–2006                             |                                    |                                       | 2007–2013                             |                                    |                                       | 2014–2020                             |                                    |                                       |
|-----------|-------------|---------------------------------------|------------------------------------|---------------------------------------|---------------------------------------|------------------------------------|---------------------------------------|---------------------------------------|------------------------------------|---------------------------------------|
| 90S–30S   |             | SET1                                  | SET2                               | ORIG                                  | SET1                                  | SET2                               | ORIG                                  | SET1                                  | SET2                               | ORIG                                  |
|           | LWW         | 2.22 ± 0.13<br><i>1.83 ± 0.13</i>     | 2.19 ± 0.11<br><i>1.83 ± 0.12</i>  | 2.39 ± 0.11<br><i>1.83 ± 0.12</i>     | 2.11 ± 0.12<br><i>1.84 ± 0.13</i>     | 2.12 ± 0.11<br><i>1.84 ± 0.12</i>  | 2.17 ± 0.11<br><i>1.84 ± 0.12</i>     | 2.43 ± 0.13<br><i>1.96 ± 0.14</i>     | 2.39 ± 0.11<br><i>1.96 ± 0.12</i>  | 2.38 ± 0.11<br><i>1.96 ± 0.13</i>     |
|           | EFMM        | 10.20 ± 0.58<br><i>8.11 ± 0.57</i>    | 10.02 ± 0.52<br><i>8.11 ± 0.52</i> | 10.96 ± 0.52<br><i>8.11 ± 0.53</i>    | 9.44 ± 0.55<br><i>8.00 ± 0.56</i>     | 9.50 ± 0.49<br><i>8.00 ± 0.51</i>  | 9.71 ± 0.48<br><i>8.00 ± 0.52</i>     | 10.16 ± 0.54<br><i>7.75 ± 0.55</i>    | 9.98 ± 0.47<br><i>7.75 ± 0.49</i>  | 9.86 ± 0.47<br><i>7.75 ± 0.50</i>     |
|           | RICE        | 0.19 ± 0.01<br><i>0.16 ± 0.01</i>     | 0.18 ± 0.01<br><i>0.16 ± 0.01</i>  | 0.20 ± 0.01<br><i>0.16 ± 0.01</i>     | 0.17 ± 0.01<br><i>0.14 ± 0.01</i>     | 0.17 ± 0.01<br><i>0.14 ± 0.01</i>  | 0.17 ± 0.01<br><i>0.14 ± 0.01</i>     | 0.16 ± 0.01<br><i>0.13 ± 0.01</i>     | 0.15 ± 0.01<br><i>0.13 ± 0.01</i>  | 0.16 ± 0.01<br><i>0.13 ± 0.01</i>     |
|           | Soil sink   | -2.30 ± -0.13<br><i>-1.78 ± -0.13</i> | -1.83 ± nan<br><i>-1.83 ± 0.00</i> | -1.83 ± -0.33<br><i>-1.78 ± -0.33</i> | -2.13 ± -0.12<br><i>-1.80 ± -0.13</i> | -1.82 ± nan<br><i>-1.82 ± 0.00</i> | -1.82 ± -0.33<br><i>-1.80 ± -0.34</i> | -2.47 ± -0.13<br><i>-1.85 ± -0.13</i> | -1.90 ± nan<br><i>-1.90 ± 0.00</i> | -1.90 ± -0.35<br><i>-1.85 ± -0.36</i> |
|           | Termites    | 0.53 ± nan<br><i>0.53 ± nan</i>       | 0.53 ± nan<br><i>0.53 ± nan</i>    | 0.53 ± nan<br><i>0.53 ± nan</i>       | 0.53 ± nan<br><i>0.53 ± nan</i>       | 0.53 ± nan<br><i>0.53 ± nan</i>    | 0.53 ± nan<br><i>0.53 ± nan</i>       | 0.53 ± nan<br><i>0.53 ± nan</i>       | 0.53 ± nan<br><i>0.53 ± nan</i>    | 0.53 ± nan<br><i>0.53 ± nan</i>       |
|           | Ocean       | 0.65 ± nan<br><i>0.65 ± nan</i>       | 0.65 ± nan<br><i>0.65 ± nan</i>    | 0.65 ± nan<br><i>0.65 ± nan</i>       | 0.65 ± nan<br><i>0.65 ± nan</i>       | 0.65 ± nan<br><i>0.65 ± nan</i>    | 0.65 ± nan<br><i>0.65 ± nan</i>       | 0.65 ± nan<br><i>0.65 ± nan</i>       | 0.65 ± nan<br><i>0.65 ± nan</i>    | 0.65 ± nan<br><i>0.65 ± nan</i>       |
|           | Wetlands    | 3.93 ± 0.22<br><i>3.15 ± 0.22</i>     | 3.24 ± nan<br><i>3.24 ± 0.00</i>   | 3.24 ± 0.58<br><i>3.15 ± 0.59</i>     | 3.69 ± 0.21<br><i>3.15 ± 0.22</i>     | 3.21 ± nan<br><i>3.21 ± 0.00</i>   | 3.21 ± 0.58<br><i>3.15 ± 0.60</i>     | 4.02 ± 0.21<br><i>3.15 ± 0.22</i>     | 3.25 ± nan<br><i>3.25 ± 0.00</i>   | 3.25 ± 0.60<br><i>3.15 ± 0.62</i>     |
|           | Oil and gas | 1.53 ± 0.18<br><i>1.22 ± 0.18</i>     | 1.56 ± 0.18<br><i>1.22 ± 0.18</i>  | 1.61 ± 0.08<br><i>1.22 ± 0.08</i>     | 1.26 ± 0.15<br><i>1.14 ± 0.15</i>     | 1.27 ± 0.15<br><i>1.14 ± 0.15</i>  | 1.35 ± 0.07<br><i>1.14 ± 0.07</i>     | 1.25 ± 0.15<br><i>1.13 ± 0.16</i>     | 1.26 ± 0.15<br><i>1.13 ± 0.16</i>  | 1.38 ± 0.07<br><i>1.13 ± 0.07</i>     |
|           | Coal        | 0.66 ± 0.08<br><i>0.55 ± 0.08</i>     | 0.67 ± 0.08<br><i>0.55 ± 0.08</i>  | 0.82 ± 0.04<br><i>0.55 ± 0.04</i>     | 0.75 ± 0.09<br><i>0.68 ± 0.09</i>     | 0.76 ± 0.09<br><i>0.68 ± 0.09</i>  | 0.88 ± 0.04<br><i>0.68 ± 0.04</i>     | 0.65 ± 0.08<br><i>0.58 ± 0.08</i>     | 0.67 ± 0.08<br><i>0.58 ± 0.08</i>  | 0.84 ± 0.04<br><i>0.58 ± 0.04</i>     |
|           | Residential | 0.08 ± nan<br><i>0.08 ± nan</i>       | 0.08 ± nan<br><i>0.08 ± nan</i>    | 0.09 ± 0.00<br><i>0.08 ± 0.01</i>     | 0.09 ± nan<br><i>0.09 ± nan</i>       | 0.09 ± nan<br><i>0.09 ± nan</i>    | 0.09 ± 0.00<br><i>0.09 ± 0.01</i>     | 0.08 ± nan<br><i>0.08 ± nan</i>       | 0.08 ± nan<br><i>0.08 ± nan</i>    | 0.08 ± 0.00<br><i>0.08 ± 0.01</i>     |
|           | Geological  | 0.54 ± nan<br><i>0.54 ± nan</i>       | 0.54 ± nan<br><i>0.54 ± nan</i>    | 0.54 ± nan<br><i>0.54 ± nan</i>       | 0.54 ± nan<br><i>0.54 ± nan</i>       | 0.54 ± nan<br><i>0.54 ± nan</i>    | 0.54 ± nan<br><i>0.54 ± nan</i>       | 0.54 ± nan<br><i>0.54 ± nan</i>       | 0.54 ± nan<br><i>0.54 ± nan</i>    | 0.54 ± nan<br><i>0.54 ± nan</i>       |
|           | Fires       | 0.19 ± nan<br><i>0.19 ± nan</i>       | 0.19 ± nan<br><i>0.19 ± nan</i>    | 0.19 ± 0.01<br><i>0.19 ± 0.01</i>     | 0.10 ± nan<br><i>0.10 ± nan</i>       | 0.10 ± nan<br><i>0.10 ± nan</i>    | 0.10 ± 0.00<br><i>0.10 ± 0.01</i>     | 0.27 ± nan<br><i>0.27 ± nan</i>       | 0.27 ± nan<br><i>0.27 ± nan</i>    | 0.27 ± 0.01<br><i>0.27 ± 0.02</i>     |

Table S3. Cont.

| Lat. band | Category    | 2000–2006                        |                              |                                  | 2007–2013                        |                              |                                  | 2014–2020                        |                              |                                  |
|-----------|-------------|----------------------------------|------------------------------|----------------------------------|----------------------------------|------------------------------|----------------------------------|----------------------------------|------------------------------|----------------------------------|
| 30S-EQ    |             | SET1                             | SET2                         | ORIG                             | SET1                             | SET2                         | ORIG                             | SET1                             | SET2                         | ORIG                             |
|           | LWW         | 8.87 ± 0.69<br>8.59 ± 0.70       | 8.85 ± 0.82<br>8.59 ± 0.84   | 8.86 ± 0.78<br>8.59 ± 0.79       | 11.04 ± 0.79<br>9.62 ± 0.77      | 11.36 ± 0.89<br>9.62 ± 0.93  | 11.24 ± 0.89<br>9.62 ± 0.88      | 11.96 ± 0.89<br>11.20 ± 0.90     | 11.97 ± 1.05<br>11.20 ± 1.09 | 11.49 ± 1.04<br>11.20 ± 1.07     |
|           | EFMM        | 20.70 ± 1.60<br>19.57 ± 1.58     | 20.56 ± 1.91<br>19.57 ± 1.91 | 20.79 ± 1.83<br>19.57 ± 1.80     | 26.54 ± 1.91<br>22.34 ± 1.80     | 27.37 ± 2.13<br>22.34 ± 2.17 | 27.01 ± 2.14<br>22.34 ± 2.04     | 26.40 ± 1.98<br>23.83 ± 1.91     | 26.31 ± 2.31<br>23.83 ± 2.32 | 25.34 ± 2.30<br>23.83 ± 2.28     |
|           | RICE        | 2.85 ± 0.22<br>2.84 ± 0.23       | 2.85 ± 0.26<br>2.84 ± 0.28   | 2.81 ± 0.25<br>2.84 ± 0.26       | 3.22 ± 0.23<br>3.34 ± 0.27       | 3.22 ± 0.26<br>3.34 ± 0.32   | 3.22 ± 0.26<br>3.34 ± 0.30       | 3.44 ± 0.26<br>3.78 ± 0.30       | 3.40 ± 0.30<br>3.78 ± 0.37   | 3.32 ± 0.30<br>3.78 ± 0.36       |
|           | Soil sink   | -12.29 ± -0.95<br>-10.85 ± -0.88 | -10.84 ± nan<br>-10.84 ± nan | -10.84 ± -1.06<br>-10.85 ± -1.06 | -12.40 ± -0.89<br>-10.93 ± -0.88 | -10.66 ± nan<br>-10.66 ± nan | -10.66 ± -1.05<br>-10.93 ± -1.07 | -13.09 ± -0.98<br>-11.24 ± -0.90 | -10.97 ± nan<br>-10.97 ± nan | -10.97 ± -1.08<br>-11.24 ± -1.11 |
|           | Termites    | 4.18 ± nan<br>4.18 ± nan         | 4.18 ± nan<br>4.18 ± nan     | 4.18 ± nan<br>4.18 ± nan         | 4.18 ± nan<br>4.18 ± nan         | 4.18 ± nan<br>4.18 ± nan     | 4.18 ± nan<br>4.18 ± nan         | 4.18 ± nan<br>4.18 ± nan         | 4.18 ± nan<br>4.18 ± nan     | 4.18 ± nan<br>4.18 ± nan         |
|           | Ocean       | 2.95 ± nan<br>2.95 ± nan         | 2.95 ± nan<br>2.95 ± nan     | 2.95 ± nan<br>2.95 ± nan         | 2.95 ± nan<br>2.95 ± nan         | 2.95 ± nan<br>2.95 ± nan     | 2.95 ± nan<br>2.95 ± nan         | 2.95 ± nan<br>2.95 ± nan         | 2.95 ± nan<br>2.95 ± nan     | 2.95 ± nan<br>2.95 ± nan         |
|           | Wetlands    | 68.17 ± 5.27<br>65.53 ± 5.31     | 65.42 ± nan<br>65.42 ± nan   | 65.42 ± 6.37<br>65.53 ± 6.41     | 68.13 ± 4.91<br>65.53 ± 5.27     | 64.18 ± nan<br>64.18 ± nan   | 64.18 ± 6.32<br>65.53 ± 6.43     | 66.74 ± 4.99<br>65.53 ± 5.26     | 63.73 ± nan<br>63.73 ± nan   | 63.73 ± 6.29<br>65.53 ± 6.45     |
|           | Oil and gas | 6.98 ± 0.96<br>6.87 ± 0.98       | 7.00 ± 0.96<br>6.87 ± 0.98   | 6.96 ± 0.61<br>6.87 ± 0.63       | 7.18 ± 1.07<br>7.10 ± 1.09       | 7.18 ± 1.07<br>7.10 ± 1.09   | 7.53 ± 0.60<br>7.10 ± 0.65       | 8.03 ± 1.40<br>7.99 ± 1.42       | 8.08 ± 1.40<br>7.99 ± 1.42   | 8.04 ± 0.73<br>7.99 ± 0.76       |
|           | Coal        | 2.15 ± 0.30<br>2.02 ± 0.29       | 2.17 ± 0.30<br>2.02 ± 0.29   | 2.29 ± 0.20<br>2.02 ± 0.19       | 3.18 ± 0.48<br>3.07 ± 0.47       | 3.19 ± 0.48<br>3.07 ± 0.47   | 3.22 ± 0.26<br>3.07 ± 0.28       | 4.33 ± 0.75<br>4.27 ± 0.76       | 4.34 ± 0.75<br>4.27 ± 0.76   | 4.19 ± 0.38<br>4.27 ± 0.41       |
|           | Residential | 1.36 ± nan<br>1.36 ± nan         | 1.36 ± nan<br>1.36 ± nan     | 1.35 ± 0.12<br>1.36 ± 0.13       | 1.44 ± nan<br>1.44 ± nan         | 1.44 ± nan<br>1.44 ± nan     | 1.42 ± 0.11<br>1.44 ± 0.13       | 1.56 ± nan<br>1.56 ± nan         | 1.56 ± nan<br>1.56 ± nan     | 1.54 ± 0.14<br>1.56 ± 0.15       |
|           | Geological  | 1.76 ± nan<br>1.76 ± nan         | 1.76 ± nan<br>1.76 ± nan     | 1.76 ± nan<br>1.76 ± nan         | 1.76 ± nan<br>1.76 ± nan         | 1.76 ± nan<br>1.76 ± nan     | 1.76 ± nan<br>1.76 ± nan         | 1.76 ± nan<br>1.76 ± nan         | 1.76 ± nan<br>1.76 ± nan     | 1.76 ± nan<br>1.76 ± nan         |
|           | Fires       | 7.99 ± nan<br>7.99 ± nan         | 7.99 ± nan<br>7.99 ± nan     | 7.93 ± 0.71<br>7.99 ± 0.75       | 6.61 ± nan<br>6.61 ± nan         | 6.61 ± nan<br>6.61 ± nan     | 6.50 ± 0.52<br>6.61 ± 0.61       | 7.67 ± nan<br>7.67 ± nan         | 7.67 ± nan<br>7.67 ± nan     | 7.55 ± 0.71<br>7.67 ± 0.75       |

Table S3. Cont.

| Lat. band | Category    | 2000–2006                      |                              |                                | 2007–2013                      |                              |                                | 2014–2020                      |                              |                                |
|-----------|-------------|--------------------------------|------------------------------|--------------------------------|--------------------------------|------------------------------|--------------------------------|--------------------------------|------------------------------|--------------------------------|
| EQ-30N    |             | SET1                           | SET2                         | ORIG                           | SET1                           | SET2                         | ORIG                           | SET1                           | SET2                         | ORIG                           |
|           | LWW         | 23.21 ± 1.46<br>22.38 ± 1.53   | 23.23 ± 1.66<br>22.38 ± 1.75 | 22.26 ± 1.31<br>22.38 ± 1.53   | 26.35 ± 1.64<br>26.78 ± 1.82   | 26.32 ± 1.87<br>26.78 ± 2.05 | 25.74 ± 1.50<br>26.78 ± 1.83   | 31.02 ± 1.89<br>31.31 ± 2.09   | 31.06 ± 2.14<br>31.31 ± 2.34 | 31.04 ± 1.75<br>31.31 ± 2.15   |
|           | EFMM        | 40.22 ± 2.54<br>38.70 ± 2.64   | 40.22 ± 2.87<br>38.70 ± 3.03 | 38.87 ± 2.28<br>38.70 ± 2.64   | 44.05 ± 2.75<br>43.43 ± 2.95   | 44.14 ± 3.14<br>43.43 ± 3.33 | 43.06 ± 2.51<br>43.43 ± 2.97   | 47.66 ± 2.91<br>46.73 ± 3.12   | 47.72 ± 3.30<br>46.73 ± 3.49 | 47.97 ± 2.70<br>46.73 ± 3.20   |
|           | RICE        | 23.27 ± 1.47<br>22.49 ± 1.54   | 23.47 ± 1.67<br>22.49 ± 1.76 | 22.24 ± 1.30<br>22.49 ± 1.53   | 23.60 ± 1.47<br>24.74 ± 1.68   | 23.27 ± 1.65<br>24.74 ± 1.90 | 22.81 ± 1.33<br>24.74 ± 1.69   | 22.61 ± 1.38<br>25.13 ± 1.68   | 22.08 ± 1.52<br>25.13 ± 1.88 | 21.82 ± 1.23<br>25.13 ± 1.72   |
|           | Soil sink   | -8.98 ± -0.57<br>-8.92 ± -0.61 | -8.85 ± nan<br>-8.85 ± nan   | -8.85 ± -0.71<br>-8.92 ± -0.72 | -8.60 ± -0.54<br>-8.92 ± -0.60 | -8.71 ± nan<br>-8.71 ± nan   | -8.71 ± -0.70<br>-8.92 ± -0.72 | -9.35 ± -0.57<br>-9.13 ± -0.61 | -8.93 ± nan<br>-8.93 ± nan   | -8.93 ± -0.72<br>-9.13 ± -0.74 |
|           | Termites    | 2.76 ± nan<br>2.76 ± nan       | 2.76 ± nan<br>2.76 ± nan     | 2.76 ± nan<br>2.76 ± nan       | 2.76 ± nan<br>2.76 ± nan       | 2.76 ± nan<br>2.76 ± nan     | 2.76 ± nan<br>2.76 ± nan       | 2.76 ± nan<br>2.76 ± nan       | 2.76 ± nan<br>2.76 ± nan     | 2.76 ± nan<br>2.76 ± nan       |
|           | Ocean       | 3.79 ± nan<br>3.79 ± nan       | 3.79 ± nan<br>3.79 ± nan     | 3.79 ± nan<br>3.79 ± nan       | 3.79 ± nan<br>3.79 ± nan       | 3.79 ± nan<br>3.79 ± nan     | 3.79 ± nan<br>3.79 ± nan       | 3.79 ± nan<br>3.79 ± nan       | 3.79 ± nan<br>3.79 ± nan     | 3.79 ± nan<br>3.79 ± nan       |
|           | Wetlands    | 50.74 ± 3.20<br>50.28 ± 3.44   | 50.08 ± nan<br>50.08 ± nan   | 50.08 ± 4.02<br>50.28 ± 4.05   | 49.89 ± 3.12<br>50.28 ± 3.41   | 49.42 ± nan<br>49.42 ± nan   | 49.42 ± 3.99<br>50.28 ± 4.06   | 49.25 ± 3.01<br>50.28 ± 3.36   | 49.27 ± nan<br>49.27 ± nan   | 49.27 ± 3.97<br>50.28 ± 4.08   |
|           | Oil and gas | 29.09 ± 3.06<br>28.71 ± 3.07   | 29.13 ± 3.06<br>28.71 ± 3.07 | 26.94 ± 1.58<br>28.71 ± 1.96   | 31.79 ± 3.28<br>30.59 ± 3.29   | 31.80 ± 3.29<br>30.59 ± 3.29 | 27.74 ± 1.61<br>30.59 ± 2.09   | 34.96 ± 3.75<br>31.21 ± 3.73   | 34.60 ± 3.76<br>31.21 ± 3.73 | 33.17 ± 1.87<br>31.21 ± 2.14   |
|           | Coal        | 3.19 ± 0.34<br>3.29 ± 0.35     | 3.20 ± 0.34<br>3.29 ± 0.35   | 3.28 ± 0.19<br>3.29 ± 0.22     | 4.94 ± 0.51<br>5.28 ± 0.57     | 4.91 ± 0.51<br>5.28 ± 0.57   | 4.95 ± 0.29<br>5.28 ± 0.36     | 5.30 ± 0.58<br>5.73 ± 0.68     | 5.25 ± 0.58<br>5.73 ± 0.68   | 5.02 ± 0.28<br>5.73 ± 0.39     |
|           | Residential | 5.84 ± nan<br>5.84 ± nan       | 5.84 ± nan<br>5.84 ± nan     | 5.78 ± 0.34<br>5.84 ± 0.40     | 6.34 ± nan<br>6.34 ± nan       | 6.34 ± nan<br>6.34 ± nan     | 6.24 ± 0.36<br>6.34 ± 0.43     | 6.48 ± nan<br>6.48 ± nan       | 6.48 ± nan<br>6.48 ± nan     | 6.37 ± 0.36<br>6.48 ± 0.44     |
|           | Geological  | 2.80 ± nan<br>2.80 ± nan       | 2.80 ± nan<br>2.80 ± nan     | 2.80 ± nan<br>2.80 ± nan       | 2.80 ± nan<br>2.80 ± nan       | 2.80 ± nan<br>2.80 ± nan     | 2.80 ± nan<br>2.80 ± nan       | 2.80 ± nan<br>2.80 ± nan       | 2.80 ± nan<br>2.80 ± nan     | 2.80 ± nan<br>2.80 ± nan       |
|           | Fires       | 3.97 ± nan<br>3.97 ± nan       | 3.97 ± nan<br>3.97 ± nan     | 3.94 ± 0.23<br>3.97 ± 0.27     | 3.53 ± nan<br>3.53 ± nan       | 3.53 ± nan<br>3.53 ± nan     | 3.48 ± 0.20<br>3.53 ± 0.24     | 3.51 ± nan<br>3.51 ± nan       | 3.51 ± nan<br>3.51 ± nan     | 3.47 ± 0.20<br>3.51 ± 0.24     |



Table S3. Cont.

| Lat. band | Category    | 2000–2006                        |                              |                                  | 2007–2013                        |                              |                                  | 2014–2020                        |                              |                                  |
|-----------|-------------|----------------------------------|------------------------------|----------------------------------|----------------------------------|------------------------------|----------------------------------|----------------------------------|------------------------------|----------------------------------|
| 30N–60N   |             | SET1                             | SET2                         | ORIG                             | SET1                             | SET2                         | ORIG                             | SET1                             | SET2                         | ORIG                             |
|           | LWW         | 34.83 ± 1.16<br>30.86 ± 1.52     | 35.12 ± 1.29<br>30.86 ± 1.70 | 32.81 ± 1.92<br>30.86 ± 2.00     | 33.82 ± 1.19<br>32.03 ± 1.67     | 33.99 ± 1.35<br>32.03 ± 1.86 | 32.37 ± 2.25<br>32.03 ± 2.39     | 36.40 ± 1.37<br>34.12 ± 1.87     | 36.52 ± 1.54<br>34.12 ± 2.07 | 34.83 ± 2.38<br>34.12 ± 2.54     |
|           | EFMM        | 42.49 ± 1.42<br>38.22 ± 1.89     | 42.82 ± 1.58<br>38.22 ± 2.10 | 40.55 ± 2.37<br>38.22 ± 2.48     | 41.44 ± 1.46<br>38.76 ± 2.02     | 41.66 ± 1.66<br>38.76 ± 2.25 | 40.80 ± 2.84<br>38.76 ± 2.89     | 44.79 ± 1.69<br>40.47 ± 2.22     | 45.00 ± 1.90<br>40.47 ± 2.46 | 44.35 ± 3.04<br>40.47 ± 3.01     |
|           | RICE        | 9.81 ± 0.33<br>8.11 ± 0.40       | 10.11 ± 0.37<br>8.11 ± 0.45  | 9.13 ± 0.53<br>8.11 ± 0.53       | 8.59 ± 0.30<br>8.57 ± 0.45       | 8.62 ± 0.34<br>8.57 ± 0.50   | 7.86 ± 0.54<br>8.57 ± 0.64       | 8.47 ± 0.32<br>8.62 ± 0.47       | 8.34 ± 0.35<br>8.62 ± 0.52   | 7.72 ± 0.53<br>8.62 ± 0.64       |
|           | Soil sink   | -11.44 ± -0.38<br>-10.66 ± -0.53 | -10.47 ± nan<br>-10.47 ± nan | -10.47 ± -0.64<br>-10.66 ± -0.67 | -11.01 ± -0.39<br>-10.77 ± -0.56 | -10.48 ± nan<br>-10.48 ± nan | -10.48 ± -0.61<br>-10.77 ± -0.68 | -11.76 ± -0.44<br>-11.12 ± -0.61 | -10.96 ± nan<br>-10.96 ± nan | -10.96 ± -0.67<br>-11.12 ± -0.73 |
|           | Termites    | 2.43 ± nan<br>2.43 ± nan         | 2.43 ± nan<br>2.43 ± nan     | 2.43 ± nan<br>2.43 ± nan         | 2.43 ± nan<br>2.43 ± nan         | 2.43 ± nan<br>2.43 ± nan     | 2.43 ± nan<br>2.43 ± nan         | 2.43 ± nan<br>2.43 ± nan         | 2.43 ± nan<br>2.43 ± nan     | 2.43 ± nan<br>2.43 ± nan         |
|           | Ocean       | 1.90 ± nan<br>1.90 ± nan         | 1.90 ± nan<br>1.90 ± nan     | 1.90 ± nan<br>1.90 ± nan         | 1.90 ± nan<br>1.90 ± nan         | 1.90 ± nan<br>1.90 ± nan     | 1.90 ± nan<br>1.90 ± nan         | 1.90 ± nan<br>1.90 ± nan         | 1.90 ± nan<br>1.90 ± nan     | 1.90 ± nan<br>1.90 ± nan         |
|           | Wetlands    | 25.22 ± 0.84<br>23.59 ± 1.17     | 23.61 ± nan<br>23.61 ± nan   | 23.61 ± 1.44<br>23.59 ± 1.49     | 25.18 ± 0.89<br>23.59 ± 1.23     | 24.01 ± nan<br>24.01 ± nan   | 24.01 ± 1.40<br>23.59 ± 1.50     | 25.14 ± 0.95<br>23.59 ± 1.29     | 23.75 ± nan<br>23.75 ± nan   | 23.75 ± 1.45<br>23.59 ± 1.55     |
|           | Oil and gas | 25.96 ± 2.84<br>25.36 ± 2.73     | 25.98 ± 2.84<br>25.36 ± 2.73 | 25.75 ± 1.51<br>25.36 ± 1.65     | 33.06 ± 4.25<br>31.03 ± 3.82     | 33.22 ± 4.23<br>31.03 ± 3.82 | 31.86 ± 2.23<br>31.03 ± 2.32     | 43.28 ± 5.09<br>39.54 ± 4.62     | 43.11 ± 5.09<br>39.54 ± 4.62 | 42.84 ± 2.93<br>39.54 ± 2.95     |
|           | Coal        | 18.65 ± 2.05<br>20.25 ± 2.20     | 18.70 ± 2.05<br>20.25 ± 2.20 | 22.96 ± 1.35<br>20.25 ± 1.33     | 20.89 ± 2.68<br>26.87 ± 3.31     | 21.24 ± 2.71<br>26.87 ± 3.31 | 25.46 ± 1.77<br>26.87 ± 2.01     | 20.62 ± 2.42<br>26.89 ± 3.15     | 20.63 ± 2.43<br>26.89 ± 3.15 | 23.00 ± 1.58<br>26.89 ± 2.00     |
|           | Residential | 4.84 ± nan<br>4.84 ± nan         | 4.84 ± nan<br>4.84 ± nan     | 4.87 ± 0.29<br>4.84 ± 0.31       | 4.46 ± nan<br>4.46 ± nan         | 4.46 ± nan<br>4.46 ± nan     | 4.41 ± 0.31<br>4.46 ± 0.33       | 4.14 ± nan<br>4.14 ± nan         | 4.14 ± nan<br>4.14 ± nan     | 4.09 ± 0.28<br>4.14 ± 0.31       |
|           | Geological  | 15.53 ± nan<br>15.53 ± nan       | 15.53 ± nan<br>15.53 ± nan   | 15.53 ± nan<br>15.53 ± nan       | 15.53 ± nan<br>15.53 ± nan       | 15.53 ± nan<br>15.53 ± nan   | 15.53 ± nan<br>15.53 ± nan       | 15.53 ± nan<br>15.53 ± nan       | 15.53 ± nan<br>15.53 ± nan   | 15.53 ± nan<br>15.53 ± nan       |
|           | Fires       | 2.29 ± nan<br>2.29 ± nan         | 2.29 ± nan<br>2.29 ± nan     | 2.25 ± 0.13<br>2.29 ± 0.15       | 2.17 ± nan<br>2.17 ± nan         | 2.17 ± nan<br>2.17 ± nan     | 2.13 ± 0.15<br>2.17 ± 0.16       | 2.33 ± nan<br>2.33 ± nan         | 2.33 ± nan<br>2.33 ± nan     | 2.29 ± 0.16<br>2.33 ± 0.17       |

Table S3. Cont.

| Lat. band | Category    | 2000–2006                      |                            |                                | 2007–2013                      |                            |                                | 2014–2020                      |                            |                                |
|-----------|-------------|--------------------------------|----------------------------|--------------------------------|--------------------------------|----------------------------|--------------------------------|--------------------------------|----------------------------|--------------------------------|
| 60N–90N   |             | SET1                           | SET2                       | ORIG                           | SET1                           | SET2                       | ORIG                           | SET1                           | SET2                       | ORIG                           |
|           | LWW         | 0.97 ± 0.06<br>0.94 ± 0.06     | 0.97 ± 0.09<br>0.94 ± 0.09 | 0.97 ± 0.18<br>0.94 ± 0.19     | 0.88 ± 0.05<br>0.88 ± 0.05     | 0.87 ± 0.07<br>0.88 ± 0.08 | 0.89 ± 0.12<br>0.88 ± 0.14     | 0.71 ± 0.04<br>0.76 ± 0.05     | 0.70 ± 0.05<br>0.76 ± 0.06 | 0.68 ± 0.06<br>0.76 ± 0.08     |
|           | EFMM        | 1.17 ± 0.07<br>1.16 ± 0.07     | 1.17 ± 0.11<br>1.16 ± 0.11 | 1.21 ± 0.22<br>1.16 ± 0.23     | 1.08 ± 0.06<br>1.07 ± 0.06     | 1.07 ± 0.08<br>1.07 ± 0.10 | 1.15 ± 0.16<br>1.07 ± 0.17     | 1.07 ± 0.06<br>1.06 ± 0.06     | 1.06 ± 0.07<br>1.06 ± 0.08 | 0.87 ± 0.08<br>1.06 ± 0.11     |
|           | RICE        | 0.00 ± 0.00<br>0.00 ± 0.00     | 0.00 ± 0.00<br>0.00 ± 0.00 | 0.00 ± 0.00<br>0.00 ± 0.00     | 0.00 ± 0.00<br>0.00 ± 0.00     | 0.00 ± 0.00<br>0.00 ± 0.00 | 0.00 ± 0.00<br>0.00 ± 0.00     | 0.00 ± 0.00<br>0.00 ± 0.00     | 0.00 ± 0.00<br>0.00 ± 0.00 | 0.00 ± 0.00<br>0.00 ± 0.00     |
|           | Soil sink   | -1.92 ± -0.11<br>-1.91 ± -0.12 | -1.88 ± nan<br>-1.88 ± nan | -1.88 ± -0.12<br>-1.91 ± -0.12 | -2.03 ± -0.11<br>-1.98 ± -0.12 | -1.99 ± nan<br>-1.99 ± nan | -1.99 ± -0.12<br>-1.98 ± -0.13 | -2.08 ± -0.11<br>-2.02 ± -0.12 | -2.06 ± nan<br>-2.06 ± nan | -2.06 ± -0.12<br>-2.02 ± -0.13 |
|           | Termites    | 0.00 ± nan<br>0.00 ± nan       | 0.00 ± nan<br>0.00 ± nan   | 0.00 ± nan<br>0.00 ± nan       | 0.00 ± nan<br>0.00 ± nan       | 0.00 ± nan<br>0.00 ± nan   | 0.00 ± nan<br>0.00 ± nan       | 0.00 ± nan<br>0.00 ± nan       | 0.00 ± nan<br>0.00 ± nan   | 0.00 ± nan<br>0.00 ± nan       |
|           | Ocean       | 2.19 ± nan<br>2.19 ± nan       | 2.19 ± nan<br>2.19 ± nan   | 2.19 ± nan<br>2.19 ± nan       | 2.19 ± nan<br>2.19 ± nan       | 2.19 ± nan<br>2.19 ± nan   | 2.19 ± nan<br>2.19 ± nan       | 2.19 ± nan<br>2.19 ± nan       | 2.19 ± nan<br>2.19 ± nan   | 2.19 ± nan<br>2.19 ± nan       |
|           | Wetlands    | 8.78 ± 0.52<br>8.65 ± 0.53     | 8.56 ± nan<br>8.56 ± nan   | 8.56 ± 0.54<br>8.65 ± 0.55     | 9.24 ± 0.50<br>8.65 ± 0.53     | 9.00 ± nan<br>9.00 ± nan   | 9.00 ± 0.53<br>8.65 ± 0.55     | 9.25 ± 0.49<br>8.65 ± 0.51     | 9.28 ± nan<br>9.28 ± nan   | 9.28 ± 0.53<br>8.65 ± 0.56     |
|           | Oil and gas | 6.70 ± 1.66<br>8.76 ± 2.32     | 6.73 ± 1.66<br>8.76 ± 2.32 | 6.44 ± 1.16<br>8.76 ± 1.77     | 5.87 ± 1.15<br>6.73 ± 1.58     | 5.92 ± 1.15<br>6.73 ± 1.58 | 5.83 ± 0.89<br>6.73 ± 1.26     | 3.73 ± 0.38<br>3.42 ± 0.40     | 3.73 ± 0.38<br>3.42 ± 0.40 | 3.66 ± 0.34<br>3.42 ± 0.36     |
|           | Coal        | 0.14 ± 0.03<br>0.13 ± 0.04     | 0.14 ± 0.03<br>0.13 ± 0.04 | 0.13 ± 0.02<br>0.13 ± 0.03     | 0.16 ± 0.03<br>0.15 ± 0.03     | 0.16 ± 0.03<br>0.15 ± 0.03 | 0.16 ± 0.02<br>0.15 ± 0.03     | 0.16 ± 0.02<br>0.16 ± 0.02     | 0.16 ± 0.02<br>0.16 ± 0.02 | 0.18 ± 0.02<br>0.16 ± 0.02     |
|           | Residential | 0.04 ± nan<br>0.04 ± nan       | 0.04 ± nan<br>0.04 ± nan   | 0.04 ± 0.01<br>0.04 ± 0.01     | 0.04 ± nan<br>0.04 ± nan       | 0.04 ± nan<br>0.04 ± nan   | 0.04 ± 0.00<br>0.04 ± 0.01     | 0.03 ± nan<br>0.03 ± nan       | 0.03 ± nan<br>0.03 ± nan   | 0.03 ± 0.00<br>0.03 ± 0.00     |
|           | Geological  | 2.37 ± nan<br>2.37 ± nan       | 2.37 ± nan<br>2.37 ± nan   | 2.37 ± nan<br>2.37 ± nan       | 2.37 ± nan<br>2.37 ± nan       | 2.37 ± nan<br>2.37 ± nan   | 2.37 ± nan<br>2.37 ± nan       | 2.37 ± nan<br>2.37 ± nan       | 2.37 ± nan<br>2.37 ± nan   | 2.37 ± nan<br>2.37 ± nan       |
|           | Fires       | 0.82 ± nan<br>0.82 ± nan       | 0.82 ± nan<br>0.82 ± nan   | 0.80 ± 0.14<br>0.82 ± 0.16     | 0.72 ± nan<br>0.72 ± nan       | 0.72 ± nan<br>0.72 ± nan   | 0.70 ± 0.08<br>0.72 ± 0.10     | 1.65 ± nan<br>1.65 ± nan       | 1.65 ± nan<br>1.65 ± nan   | 1.61 ± 0.16<br>1.65 ± 0.18     |

Table S3. Cont.

| Lat. band | Category    | 2000–2006                        |                                |                                  | 2007–2013                        |                                |                                  | 2014–2020                        |                                |                                  |
|-----------|-------------|----------------------------------|--------------------------------|----------------------------------|----------------------------------|--------------------------------|----------------------------------|----------------------------------|--------------------------------|----------------------------------|
| Global    |             | SET1                             | SET2                           | ORIG                             | SET1                             | SET2                           | ORIG                             | SET1                             | SET2                           | ORIG                             |
|           | LWW         | 70.11 ± 3.62<br>64.60 ± 4.06     | 70.36 ± 4.09<br>64.60 ± 4.61   | 67.29 ± 4.41<br>64.60 ± 4.75     | 74.20 ± 3.93<br>71.15 ± 4.57     | 74.66 ± 4.40<br>71.15 ± 5.16   | 72.40 ± 4.97<br>71.15 ± 5.47     | 82.52 ± 4.45<br>79.35 ± 5.18     | 82.64 ± 5.01<br>79.35 ± 5.81   | 80.42 ± 5.46<br>79.35 ± 6.09     |
|           | EFMM        | 114.79 ± 6.78<br>105.77 ± 7.33   | 114.80 ± 7.49<br>105.77 ± 8.18 | 112.38 ± 7.74<br>105.77 ± 8.21   | 122.53 ± 7.28<br>113.59 ± 7.95   | 123.74 ± 8.00<br>113.59 ± 8.86 | 121.72 ± 8.59<br>113.59 ± 9.10   | 130.07 ± 7.71<br>119.85 ± 8.41   | 130.08 ± 8.52<br>119.85 ± 9.33 | 128.38 ± 9.05<br>119.85 ± 9.61   |
|           | RICE        | 36.12 ± 2.03<br>33.59 ± 2.19     | 36.61 ± 2.32<br>33.59 ± 2.50   | 34.38 ± 2.10<br>33.59 ± 2.34     | 35.58 ± 2.03<br>36.80 ± 2.41     | 35.27 ± 2.27<br>36.80 ± 2.74   | 34.06 ± 2.14<br>36.80 ± 2.65     | 34.68 ± 1.97<br>37.66 ± 2.47     | 33.98 ± 2.19<br>37.66 ± 2.79   | 33.01 ± 2.07<br>37.66 ± 2.74     |
|           | Soil sink   | -36.92 ± -2.27<br>-34.11 ± -2.38 | -33.86 ± nan<br>-33.86 ± nan   | -33.86 ± -3.18<br>-34.11 ± -3.24 | -36.19 ± -2.18<br>-34.40 ± -2.42 | -33.65 ± nan<br>-33.65 ± nan   | -33.65 ± -3.14<br>-34.40 ± -3.29 | -38.75 ± -2.36<br>-35.35 ± -2.50 | -34.82 ± nan<br>-34.82 ± nan   | -34.82 ± -3.29<br>-35.35 ± -3.43 |
|           | Termites    | 9.91 ± nan<br>9.91 ± nan         | 9.91 ± nan<br>9.91 ± nan       | 9.91 ± nan<br>9.91 ± nan         | 9.91 ± nan<br>9.91 ± nan         | 9.91 ± nan<br>9.91 ± nan       | 9.91 ± nan<br>9.91 ± nan         | 9.91 ± nan<br>9.91 ± nan         | 9.91 ± nan<br>9.91 ± nan       | 9.91 ± nan<br>9.91 ± nan         |
|           | Ocean       | 11.48 ± nan<br>11.48 ± nan       | 11.48 ± nan<br>11.48 ± nan     | 11.48 ± nan<br>11.48 ± nan       | 11.48 ± nan<br>11.48 ± nan       | 11.48 ± nan<br>11.48 ± nan     | 11.48 ± nan<br>11.48 ± nan       | 11.48 ± nan<br>11.48 ± nan       | 11.48 ± nan<br>11.48 ± nan     | 11.48 ± nan<br>11.48 ± nan       |
|           | Wetlands    | 156.84 ± 10.27<br>151.20 ± 10.88 | 150.91 ± nan<br>150.91 ± nan   | 150.91 ± 13.54<br>151.20 ± 13.67 | 156.12 ± 9.84<br>151.20 ± 10.88  | 149.82 ± nan<br>149.82 ± nan   | 149.82 ± 13.40<br>151.20 ± 13.73 | 154.41 ± 9.86<br>151.20 ± 10.87  | 149.28 ± nan<br>149.28 ± nan   | 149.28 ± 13.44<br>151.20 ± 13.86 |
|           | Oil and gas | 70.26 ± 8.89<br>70.92 ± 9.45     | 70.40 ± 8.89<br>70.92 ± 9.45   | 67.70 ± 5.02<br>70.92 ± 6.17     | 79.15 ± 10.05<br>76.59 ± 10.08   | 79.40 ± 10.05<br>76.59 ± 10.08 | 74.31 ± 5.46<br>76.59 ± 6.47     | 91.25 ± 10.92<br>83.29 ± 10.48   | 90.77 ± 10.93<br>83.29 ± 10.48 | 89.08 ± 6.01<br>83.29 ± 6.35     |
|           | Coal        | 24.80 ± 2.87<br>26.24 ± 3.03     | 24.87 ± 2.87<br>26.24 ± 3.03   | 29.48 ± 1.85<br>26.24 ± 1.84     | 29.91 ± 3.88<br>36.05 ± 4.57     | 30.26 ± 3.90<br>36.05 ± 4.57   | 34.67 ± 2.42<br>36.05 ± 2.76     | 31.06 ± 3.93<br>37.63 ± 4.77     | 31.05 ± 3.94<br>37.63 ± 4.77   | 33.22 ± 2.33<br>37.63 ± 2.90     |
|           | Residential | 12.17 ± nan<br>12.17 ± nan       | 12.17 ± nan<br>12.17 ± nan     | 12.14 ± 0.76<br>12.17 ± 0.86     | 12.37 ± nan<br>12.37 ± nan       | 12.37 ± nan<br>12.37 ± nan     | 12.19 ± 0.80<br>12.37 ± 0.92     | 12.29 ± nan<br>12.29 ± nan       | 12.29 ± nan<br>12.29 ± nan     | 12.11 ± 0.79<br>12.29 ± 0.92     |
|           | Geological  | 23.00 ± nan<br>23.00 ± nan       | 23.00 ± nan<br>23.00 ± nan     | 23.00 ± nan<br>23.00 ± nan       | 23.00 ± nan<br>23.00 ± nan       | 23.00 ± nan<br>23.00 ± nan     | 23.00 ± nan<br>23.00 ± nan       | 23.00 ± nan<br>23.00 ± nan       | 23.00 ± nan<br>23.00 ± nan     | 23.00 ± nan<br>23.00 ± nan       |
|           | Fires       | 15.26 ± nan<br>15.26 ± nan       | 15.26 ± nan<br>15.26 ± nan     | 15.11 ± 1.23<br>15.26 ± 1.36     | 13.13 ± nan<br>13.13 ± nan       | 13.13 ± nan<br>13.13 ± nan     | 12.91 ± 0.96<br>13.13 ± 1.12     | 15.44 ± nan<br>15.44 ± nan       | 15.44 ± nan<br>15.44 ± nan     | 15.18 ± 1.25<br>15.44 ± 1.38     |

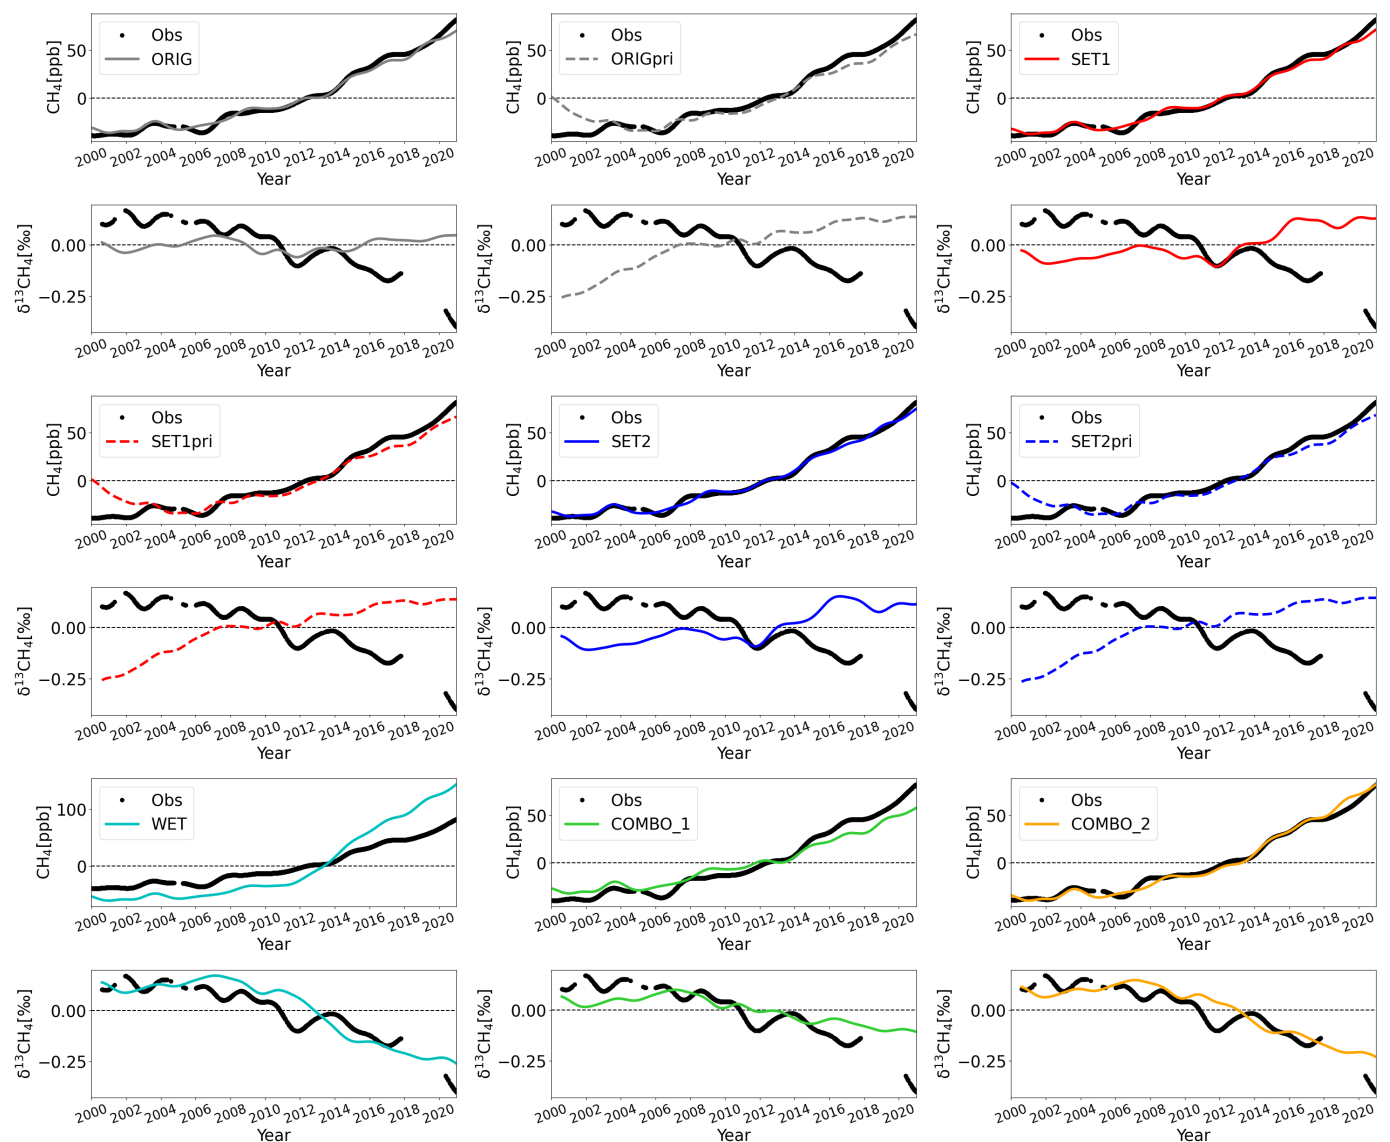

**Figure S8.** Anomalies in the  $\text{CH}_4$  and  $\delta^{13}\text{CH}_4$  trend at Alert, Canada. Different simulations are shown with different colors. Simulations with prior emission are shown as dashed lines. Note that ORIGpri and SET1pri are the same.

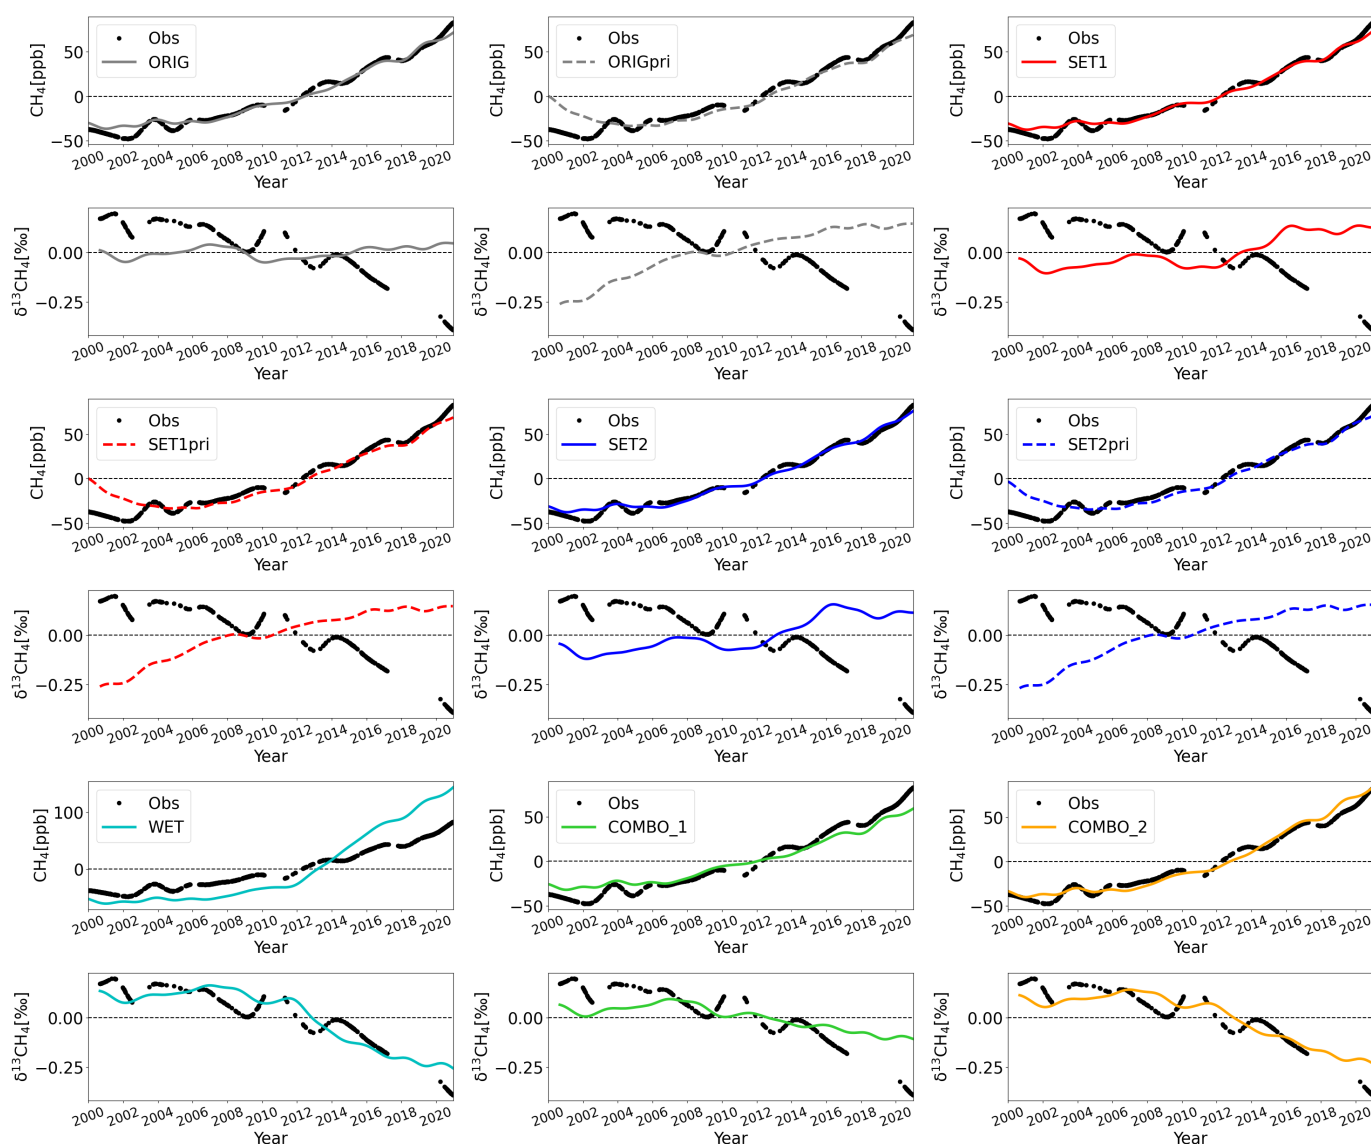

**Figure S9.** Anomalies in the  $\text{CH}_4$  and  $\delta^{13}\text{CH}_4$  trend at Terceira Island, Azores, Portugal. Different simulations are shown with different colors. Simulations with prior emission are shown as dashed lines. Note that ORIGpri and SET1pri are the same.

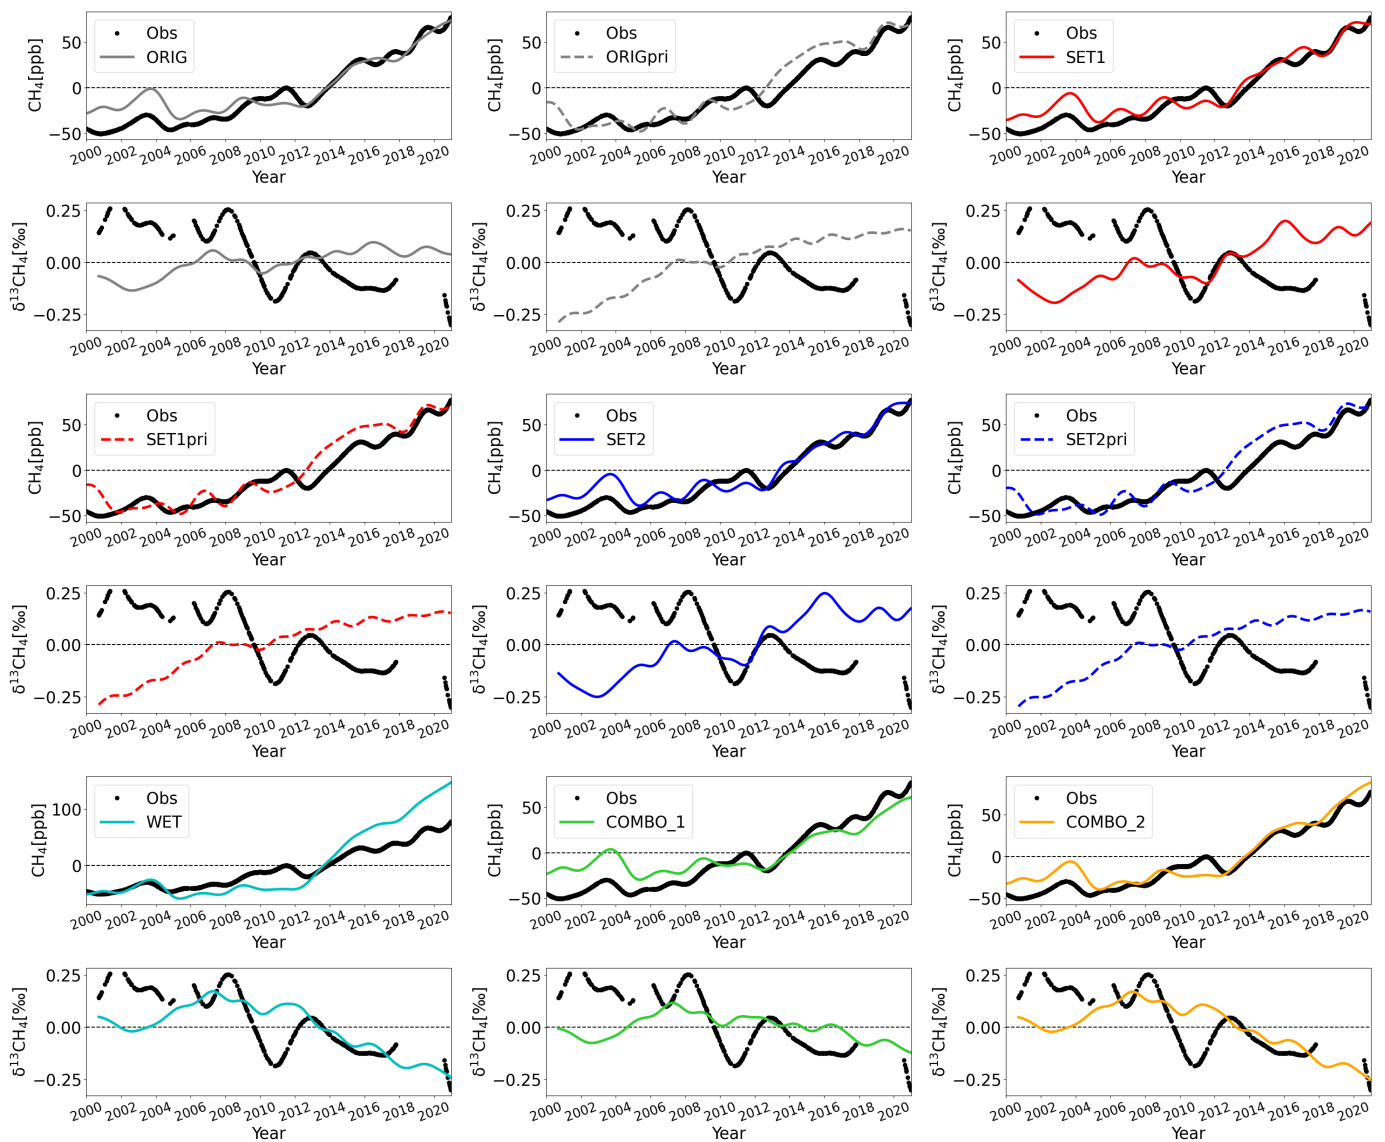

**Figure S10.** Anomalies in the  $\text{CH}_4$  and  $\delta^{13}\text{CH}_4$  trend at Tae-ahn Peninsula, Republic of Korea. Different simulations are shown with different colors. Simulations with prior emission are shown as dashed lines. Note that ORIGpri and SET1pri are the same.

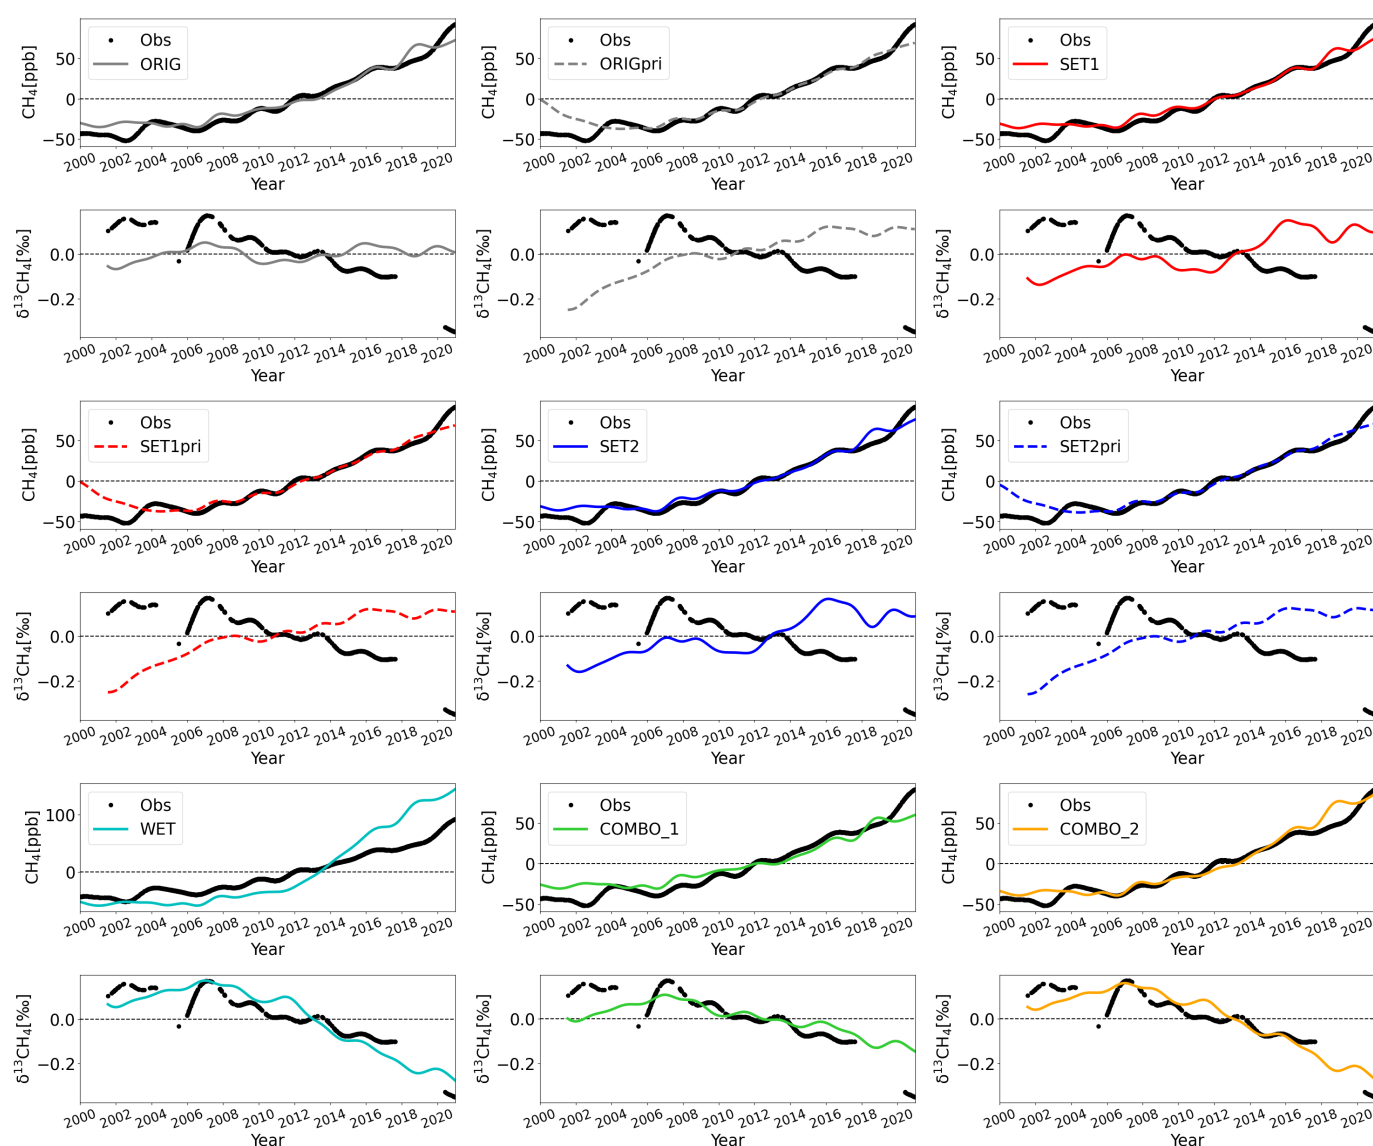

**Figure S11.** Anomalies in the  $\text{CH}_4$  and  $\delta^{13}\text{CH}_4$  trend at Mt. Waliguan, Peoples Republic of China. Different simulations are shown with different colors. Simulations with prior emission are shown as dashed lines. Note that ORIGpri and SET1pri are the same.

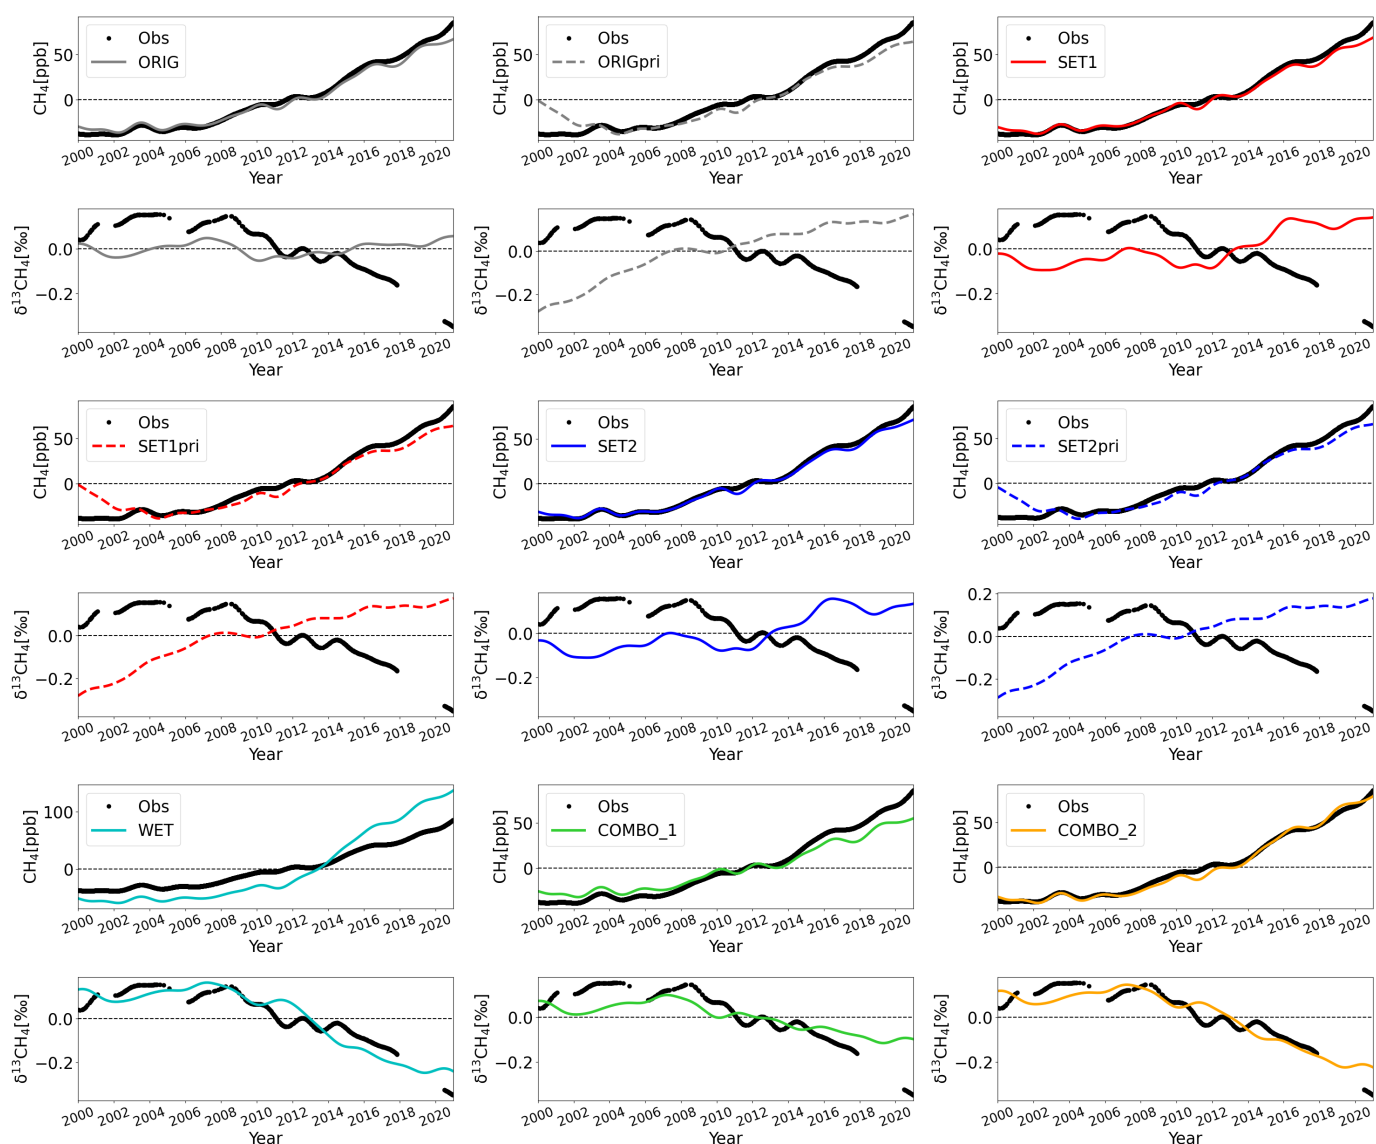

**Figure S12.** Anomalies in the CH<sub>4</sub> and δ<sup>13</sup>CH<sub>4</sub> trend at Cape Kumukahi, Hawaii, United States. Different simulations are shown with different colors. Simulations with prior emission are shown as dashed lines. Note that ORIGpri and SET1pri are the same.



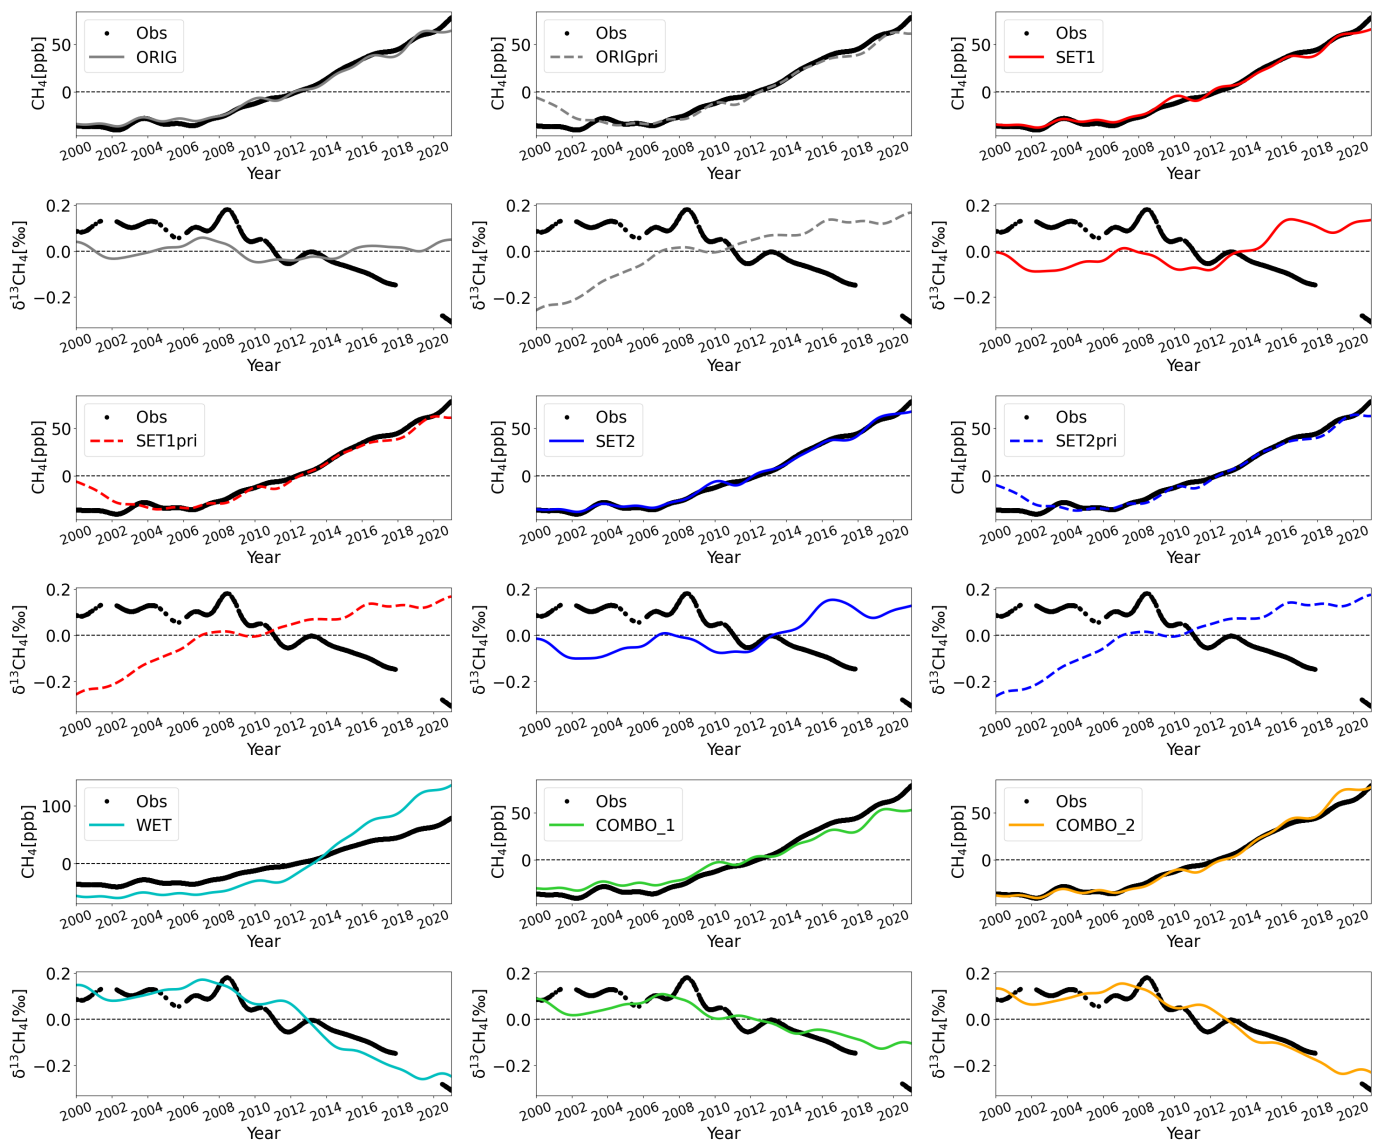

**Figure S13.** Anomalies in the  $\text{CH}_4$  and  $\delta^{13}\text{CH}_4$  trend at Mauna Loa, Hawaii, United States. Different simulations are shown with different colors. Simulations with prior emission are shown as dashed lines. Note that ORIGpri and SET1pri are the same.

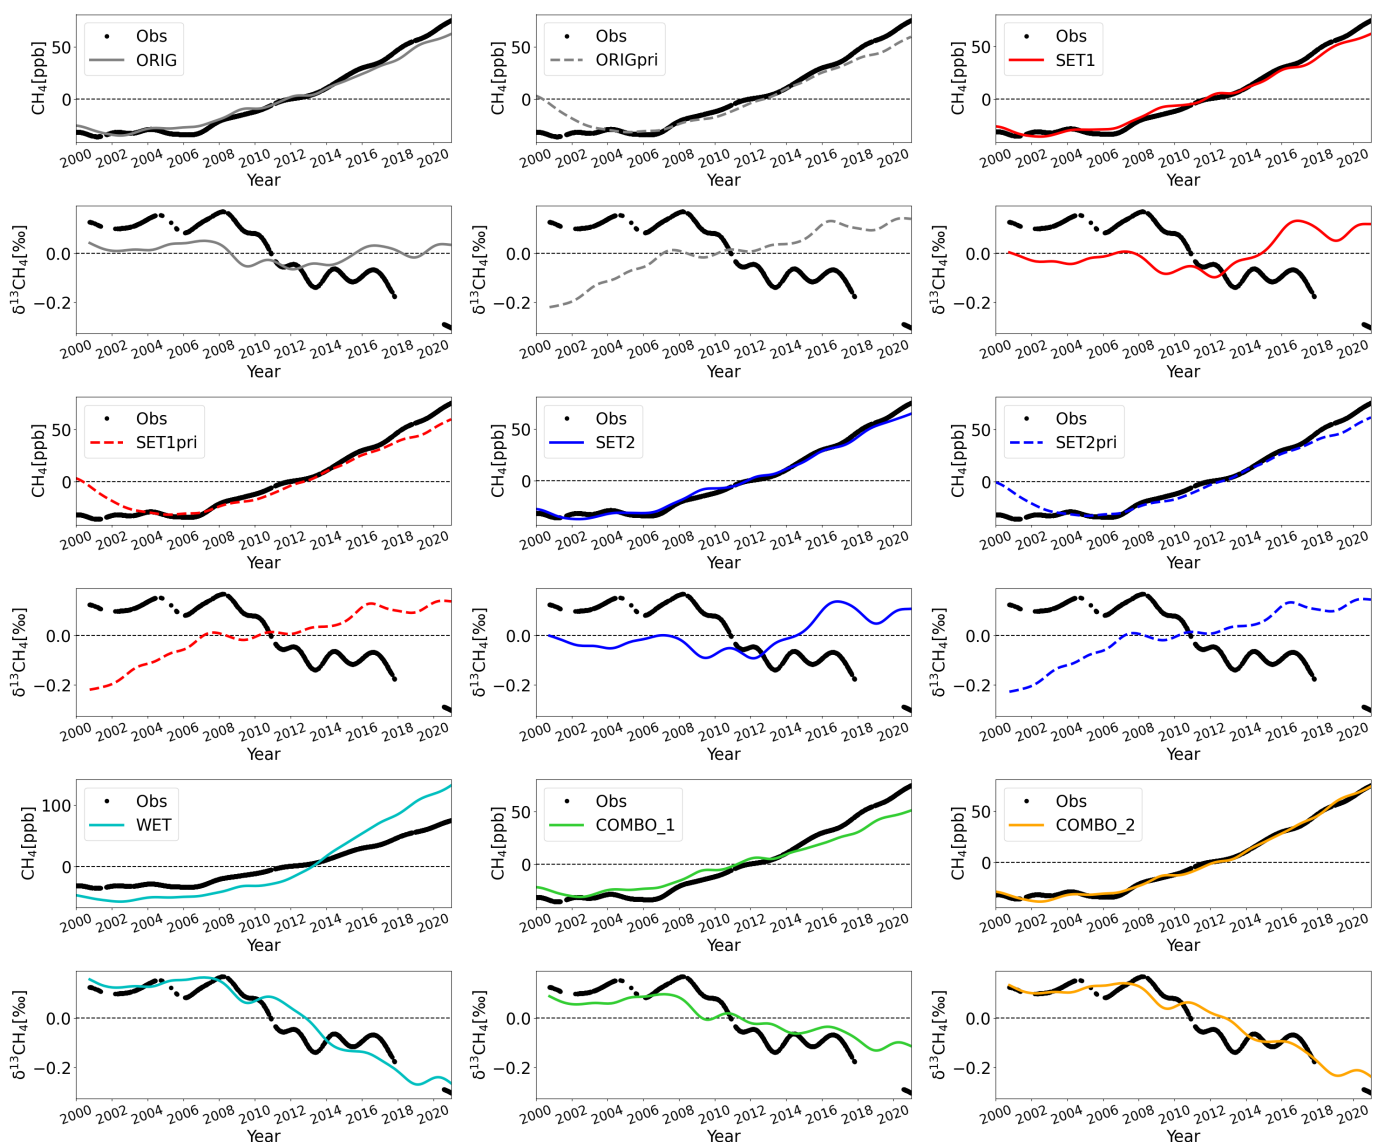

**Figure S14.** Anomalies in the  $\text{CH}_4$  and  $\delta^{13}\text{CH}_4$  trend at Ascension Island, United Kingdom. Different simulations are shown with different colors. Simulations with prior emission are shown as dashed lines. Note that ORIGpri and SET1pri are the same.

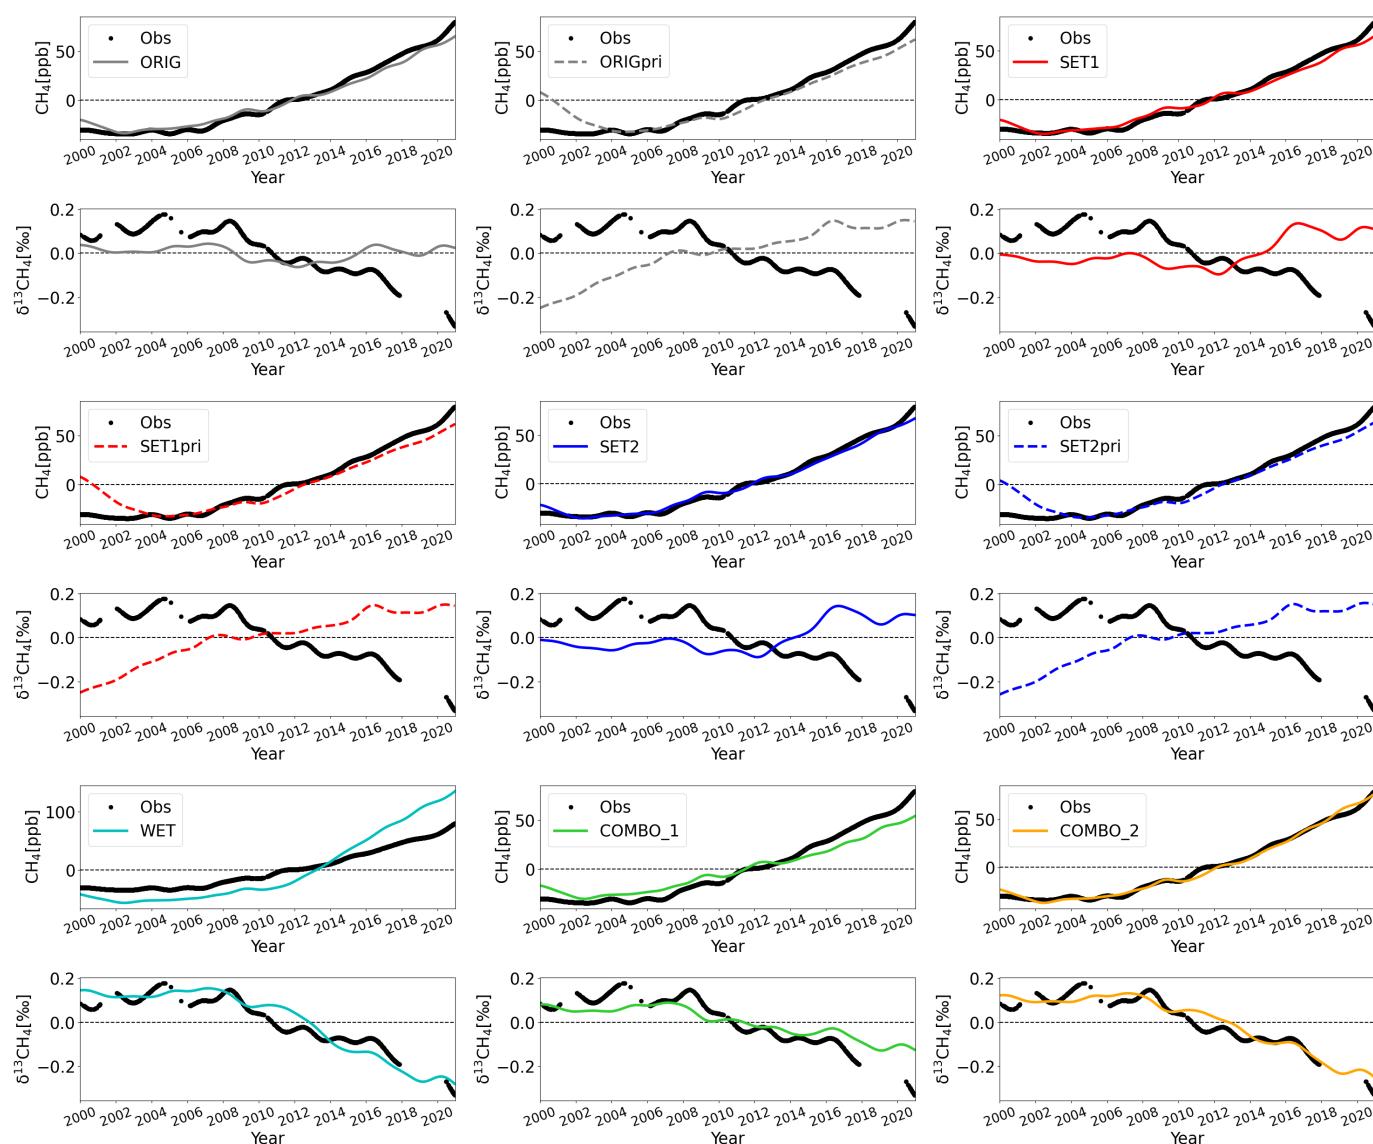

**Figure S15.** Anomalies in the  $\text{CH}_4$  and  $\delta^{13}\text{CH}_4$  trend at Tutuila, American Samoa. Different simulations are shown with different colors. Simulations with prior emission are shown as dashed lines. Note that ORIGpri and SET1pri are the same.

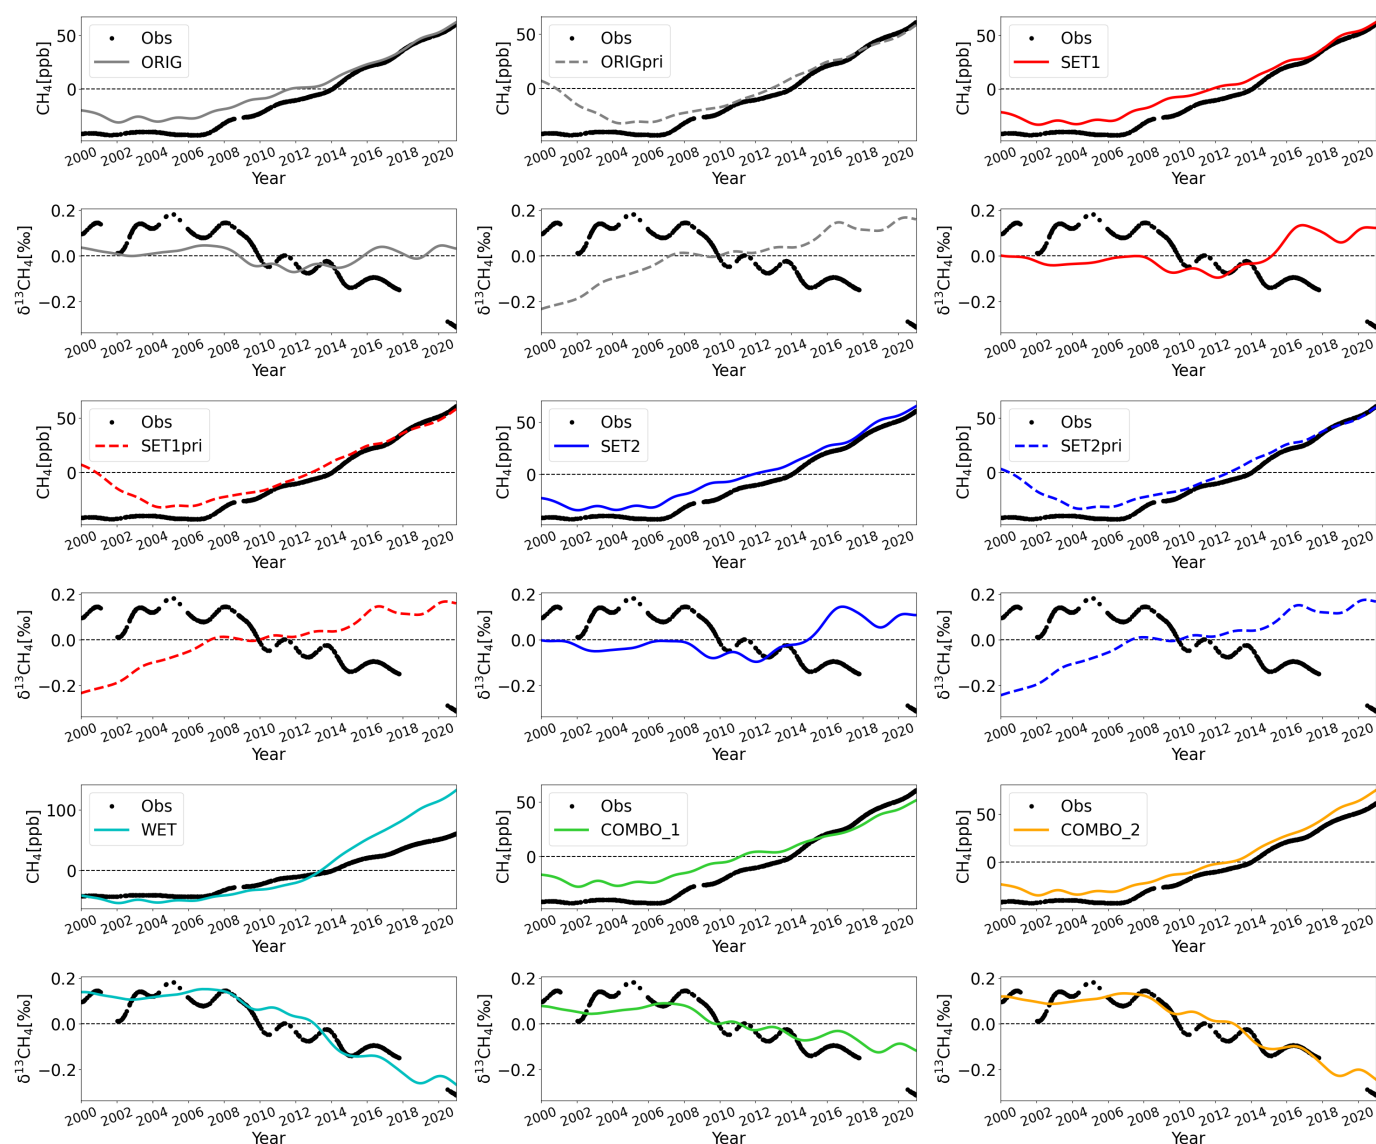

**Figure S16.** Anomalies in the  $\text{CH}_4$  and  $\delta^{13}\text{CH}_4$  trend at Cape Grim, Tasmania, Australia. Different simulations are shown with different colors. Simulations with prior emission are shown as dashed lines. Note that ORIGpri and SET1pri are the same.
